# Supplementary material for: Differences in Gene Expression Profiles and Phenotypes of Differentiated SH-SY5Y Neurons Stably Overexpressing Mitochondrial Ferritin
Source: Front Mol Neurosci. 2019 Jan 8;11:470. doi: 10.3389/fnmol.2018.00470 (PMC6331485; doi:10.3389/fnmol.2018.00470)
Supplement: Supplemental File 2 — Microsoft Excel File complete results of expression intensities with changes up or down by more than 1 log2 comparing between highest expressing clone (HighB) and untransfected cells. [file Data_Sheet_2.xlsx]

## Sheet: Upregulated
Gene Symbol	Representative Public ID	High B	Medium	Untransfected	Log2	Fold changes
GDF15	AF003934	6342.54	1085.17	301.76	4.39359	21.0185
SGK1	NM_005627	1845.59	1324.85	180.591	3.35329	10.2197
TFPI2	L27624	2785.19	1673.22	340.752	3.03098	8.17365
TENM1	AL022718	1563.16	798.975	192.312	3.02295	8.12826
MSN	NM_002444	676.454	214.88	86.9055	2.96047	7.78378
CDKN1A	NM_000389	3276.99	1648.41	460.79	2.83019	7.11167
VIP	NM_003381	1376.02	1140.04	194.234	2.82463	7.08434
ZDHHC2	AK001608	1586.26	1416.18	246.498	2.68598	6.43518
ACTA2	NM_001613	875.097	474.896	158.11	2.46851	5.53474
TFPI2	AL574096	1048.89	680.012	195.496	2.42365	5.36527
ID1	D13889	889.672	289.411	168.505	2.40049	5.27981
SLIT2	AF055585	793.139	280.285	150.948	2.39353	5.2544
SPATA18	AI559300	307.415	129.626	59.4232	2.37109	5.17331
MATN2	NM_002380	215.933	160.809	42.6165	2.3411	5.06688
FRMD3	BF589413	249.688	169.47	52.7631	2.24253	4.73225
FN1	AK026737	1167.1	1161.89	252.245	2.21004	4.62687
ZDHHC2	AI814257	502.555	433.605	108.646	2.20964	4.6256
FN1	BC005858	910.347	1255.69	197.553	2.20418	4.60812
SLC35F1	AI809083	253.95	154.456	56.2785	2.17389	4.51238
KITLG	AI446414	1291.59	846.827	288.426	2.16287	4.47806
KIAA0125	NM_014792	1556.07	1046.12	365.723	2.08908	4.25477
IL13RA1	U81380	132.61	118.595	31.4985	2.07384	4.21005
RGS13	AF030107	915.599	1685.92	217.975	2.07055	4.20047
EGR1	AI459194	1185.22	1212.16	289.622	2.03291	4.09229
OSBPL3	AI202969	292.942	107.468	73.8421	1.9881	3.96714
THSD4	BG163478	819.106	497.041	211.342	1.95447	3.87574
ANXA2	BC001388	1154.76	784.792	300.287	1.94318	3.84553
HPCAL1	NM_002149	3921.2	2439.98	1039.81	1.91497	3.77107
TSPAN12	NM_012338	330.171	290.936	87.6285	1.91374	3.76785
SLIT2	AI692523	536.129	170.202	142.782	1.90876	3.75487
EGR3	NM_004430	186.428	88.899	50.0997	1.89574	3.72114
ANXA2	BE908217	1029.15	668.998	278.667	1.88484	3.69311
OSBPL3	AY008372	539.273	263.586	148.456	1.86098	3.63255
INHBA	M13436	524.768	294.878	144.751	1.8581	3.6253
GNG11	NM_004126	5731.5	3788.08	1600.47	1.84041	3.58113
C9orf135	AI768674	136.609	102.539	38.9433	1.8106	3.50789
OXR1	AF309387	298.472	178.674	85.7155	1.79997	3.48212
EGR1	NM_001964	2663.82	2920.47	768.576	1.79324	3.46592
PHLDB2	AK025444	219.501	148.251	63.6461	1.78608	3.44877
RGS13	BC036950	161.744	265.018	47.0045	1.78284	3.44103
ANXA2	NM_004039	1052.36	758.158	307.711	1.77397	3.41995
HEBP2	NM_014320	1092.77	1035.31	319.901	1.77229	3.41595
HPCAL1	BE617588	11123.2	7859.7	3264.26	1.76875	3.40758
MGST1	NM_020300	161.744	100.429	47.6176	1.76415	3.39673
NQO1	NM_000903	354.161	392.366	104.826	1.75642	3.37858
CHRM1	AI500293	353.813	259.877	106.542	1.73156	3.32087
SIPA1L2	AB037810	5901.5	2824.8	1782.94	1.72682	3.30998
PLK2	NM_006622	613.723	1129.75	187.647	1.70956	3.27062
TLX2	NM_016170	872.39	478.056	268.331	1.70096	3.25117
INHBA	AI343467	1882.41	776.671	589.252	1.67563	3.19459
KCNK1	U90065	274.827	272.498	86.3631	1.67004	3.18223
MEST	NM_002402	555.823	382.39	176.116	1.6581	3.156
SIPA1L2	AK022852	2565.72	1497.67	817.465	1.65013	3.13863
CPED1	BF724137	1077.73	1916.29	345.349	1.64187	3.1207
SSH2	AB072359	122.455	89.343	39.7296	1.62396	3.0822
NTNG2	AI348745	734.3	577.289	241.339	1.60531	3.04261
PRSS12	NM_003619	3305.85	1575.94	1093.78	1.5957	3.0224
PRKCH	NM_006255	443.12	720.033	146.735	1.59448	3.01986
CEP104	AI936976	399.537	311.132	132.768	1.58942	3.00928
TSPAN13	NM_014399	725.599	304.696	241.24	1.58871	3.00779
GATA4	AV700724	983.842	634.651	327.223	1.58815	3.00664
PGLS	AI400224	176.783	157.215	58.9203	1.58514	3.00037
ZMAT3	AI632728	4845.26	2937.12	1635.4	1.56693	2.96273
GFER	AF124604	185.822	134.008	63.6676	1.54529	2.91863
NHLH2	AA166895	218.326	61.6317	74.9781	1.54194	2.91187
NQO1	BC000906	560.016	485.53	192.515	1.5405	2.90895
ZMAT3	N36085	2253.95	1302.44	774.853	1.54046	2.90887
FN1	AF130095	1231.63	1196.43	423.972	1.53853	2.90498
GNG11	AW052186	291.835	219.595	100.527	1.53756	2.90304
FRMD3	BF110588	406.866	251.888	141.339	1.52539	2.87865
DDAH1	NM_012137	373.768	280.467	131.01	1.51246	2.85297
TSPAN15	NM_012339	445.023	211.306	159.375	1.48146	2.79231
DTX3L	AA577672	365.461	304.932	131.221	1.47771	2.78507
RDH10	AW150720	384.932	334.63	138.288	1.47693	2.78355
PLEKHA6	NM_014935	630.523	510.547	227.761	1.46903	2.76835
SLC41A2	AI769269	201.558	136.503	74.1383	1.4429	2.71867
MAN1A1	NM_005907	268.393	132.089	99.1469	1.43671	2.70702
SYK	BF593625	165.3	125.945	61.0736	1.43646	2.70657
SLC2A6	NM_017585	688.688	598.793	255.079	1.43291	2.6999
FN1	X02761	826.219	1180.44	307.239	1.42716	2.68917
RPS27L	AW958475	269.185	163.788	101.029	1.41383	2.66443
SCG2	NM_003469	16038.4	11131	6025.04	1.41248	2.66195
ANKRD11	AF130076	1806.04	1611.54	681.598	1.40584	2.64972
TRAF3IP2	AL008730	1075.83	531.747	407.62	1.40016	2.6393
PRNP	AV725328	328.909	188.061	124.67	1.39957	2.63824
GNG4	AF493872	2418.41	1519.29	918.71	1.39638	2.6324
GAS6-AS1	AI479082	274.438	129.621	104.267	1.3962	2.63207
TBX3	N29712	1181.04	1308.91	449.486	1.39371	2.62754
JUNB	NM_002229	551.155	326.594	210.583	1.38807	2.61728
TSLP	AW118681	316.808	411.736	121.819	1.37887	2.60065
NEK1	AI936517	485.99	382.166	186.913	1.37856	2.60009
PPIC	BE962749	918.013	764.46	353.111	1.37839	2.59979
ID2	NM_002166	2038.24	1229.88	786.287	1.37419	2.59223
LONRF2	BF433341	525.964	490.735	203.649	1.36888	2.58269
SKIL	NM_005414	120.155	103.294	46.5858	1.36693	2.57921
PRSS12	AI810767	5270.63	2347.71	2060.53	1.35496	2.5579
TBX3	AI806338	3761.07	3815.46	1473.23	1.35216	2.55294
LRRTM1	BF529195	450.104	204.846	176.765	1.34842	2.54633
RARA	AJ417079	189.26	144.47	74.4244	1.34652	2.54298
PTGR1	AL135787	441.785	249.66	173.973	1.34448	2.53939
POPDC3	NM_022361	1069.53	867.126	421.546	1.34322	2.53716
GNG8	AF188179	13436.3	9694.24	5301.6	1.34164	2.53439
SLC7A11	AA488687	101.615	96.123	40.1728	1.33883	2.52946
EGLN1	AF277174	201.039	143.989	79.5068	1.33832	2.52858
MBNL3	AI197932	671.188	193.721	265.72	1.33681	2.52592
RPS27L	BC003667	548.026	355.538	217.349	1.33423	2.52141
PTX3	NM_002852	275.855	227.065	109.544	1.3324	2.51821
ZMAT3	NM_022470	2193.01	1235.95	873.667	1.32776	2.51013
ZCCHC10	BC015986	430.232	229.765	171.534	1.32662	2.50815
SOCS4	NM_080867	90.8979	40.1845	36.3869	1.32083	2.49809
TNFRSF10B	AF016266	5780.2	4152.34	2317.46	1.31858	2.4942
MTUS1	AL096842	142.95	201.417	57.3677	1.3172	2.49182
FERMT2	AI928241	1169.76	869.893	471.28	1.31156	2.48209
GREB1L	AB051559	227.841	135.667	92.1821	1.30547	2.47164
ESRRG	AF094518	3280.42	2256.43	1332.89	1.29932	2.46113
GLRX	NM_002064	807.927	574.807	328.371	1.2989	2.46041
PLXNA4	AL117427	1500.73	668.358	610.585	1.2974	2.45785
TIGAR	NM_020375	1341.25	971.422	549.75	1.28673	2.43975
TCERG1L	AI732913	573.748	532.819	236.092	1.28107	2.43019
DUSP5	U16996	382.618	248.158	157.605	1.2796	2.42771
IL13RA1	U62858	129.237	135.32	53.3171	1.27734	2.42392
BEND6	N48613	170.501	239.337	70.6963	1.27007	2.41174
CEBPB	AL564683	907.159	773.682	376.413	1.26904	2.41001
NUDT14	W24623	330.257	217.46	137.256	1.26672	2.40614
CALCA	BF447272	549.19	11152.6	228.687	1.26393	2.40149
HELLS	AU150825	204.366	156.756	85.4893	1.25734	2.39054
PI15	AI088609	1934.99	779.038	816.248	1.24524	2.37059
VCAN	NM_004385	9645.36	5476.53	4090.85	1.23743	2.35779
GOLIM4	NM_014498	452.126	362.024	192.318	1.23323	2.35093
CCNYL1	AW135279	360.567	323.844	153.612	1.23098	2.34726
TBX3	NM_016569	2061.38	2189.26	878.604	1.23033	2.3462
POLE4	NM_019896	596.874	342.454	255.614	1.22346	2.33506
GBE1	NM_000158	749.948	526.66	321.919	1.22009	2.32962
ITPR1	L38019	459.496	163.652	197.512	1.21811	2.32642
LOC286254 /// NALT1	AI471954	213.831	218.186	91.9691	1.21725	2.32503
STX7	AI566082	363.879	294.659	156.506	1.21724	2.32502
SPP1	M83248	205.066	207.25	88.2167	1.21697	2.32458
CYB561	BC000021	2881.58	1567.36	1245.44	1.2102	2.3137
ZMAT3	AL533234	2197.88	1359.38	950.239	1.20975	2.31298
BLOC1S2	BF382281	4443.96	3214.64	1922.72	1.2087	2.31129
IGSF11	BE221674	357.665	672.571	154.862	1.20762	2.30957
CD58	D28586	492.617	238.524	213.429	1.20671	2.30811
HDAC8	AF212246	185.069	94.2086	80.3307	1.20404	2.30384
DPYSL3	W72516	3305.89	2173.21	1440.76	1.19821	2.29454
PLA2G16	BC001387	1332.13	931.297	580.794	1.19764	2.29364
SZRD1	BG171020	467.141	274.379	203.673	1.1976	2.29358
PTGES2	NM_025072	379.125	316.309	165.759	1.19359	2.28721
SERP2	AI420319	1363.38	1091.95	597.312	1.19063	2.28252
GPNMB	NM_002510	173.318	98.5115	75.9712	1.1899	2.28136
BTG2	NM_006763	827.928	735.947	362.926	1.18983	2.28125
GADD45A	NM_001924	2275.97	1566.55	997.986	1.18939	2.28056
ZMAT3	AF355465	683.38	509.065	300.036	1.18755	2.27766
STK17B	N51102	237.753	179.427	104.62	1.18431	2.27255
RASSF8	NM_007211	266.389	173.476	117.3	1.18333	2.27101
HRASLS	NM_020386	140.502	88.1397	62.0098	1.18002	2.2658
RGS2	NM_002923	5378.3	5229.07	2375.14	1.17914	2.26441
LMNA	NM_005572	1604.93	1254.9	709.745	1.17713	2.26127
KCTD7	BC042482	177.332	109.113	78.4481	1.17664	2.2605
KALRN	NM_003947	298.552	205.753	132.204	1.17522	2.25827
C12orf45	BE264828	336.843	194.516	149.325	1.17362	2.25577
VCAM1	NM_001078	56.1056	52.0503	24.8987	1.17207	2.25335
CAST	NM_001750	867.991	592.803	385.223	1.17199	2.25322
LOC283731	AK095530	922.168	724.995	409.586	1.17086	2.25146
RNF144A-AS1	AK090737	307.173	211.103	136.554	1.16958	2.24946
TPM4	BC002827	1559.66	1420.92	693.463	1.16934	2.24908
GRK5	AK097099	405.623	232.613	180.966	1.16442	2.24143
ATP6V0E1	NM_003945	198.835	185.482	88.8283	1.16248	2.23842
VIM	AI922599	619.42	607.482	277.295	1.1595	2.2338
VCAN	BF218922	11886.3	6730.22	5329.07	1.15735	2.23047
PLXNA4	AB046770	830.042	410.053	374.251	1.14918	2.21788
GABARAPL1 /// GABARAPL3	AF180519	994.373	1019.02	448.758	1.14785	2.21583
C8orf49	AK055534	151.097	128.238	68.2366	1.14686	2.21431
GLRX	AF162769	629.256	650.931	286.379	1.13572	2.19729
NPC2	NM_006432	3293.62	2583.29	1505.51	1.12942	2.18771
BAMBI	NM_012342	566.553	471.772	259.33	1.12742	2.18468
KLHL7	NM_018846	617.464	515.119	282.837	1.12638	2.18311
FAM53A	BC042071	137.145	63.669	62.8459	1.12581	2.18225
SYT4	AB037763	16515.3	7600.49	7576.25	1.12425	2.17988
TMEM108	BC000568	1229.31	583.663	565.315	1.12072	2.17456
PTN	M57399	2427.85	1786.69	1118.73	1.11782	2.17018
MPV17L2	BC005064	383.483	278.384	176.977	1.1156	2.16685
PPARD	AI201116	241.368	130.794	111.619	1.11265	2.16243
PIP4K2A	AW665227	208.884	194.378	96.8279	1.1092	2.15727
NAT1	NM_000662	204.892	135.688	95.2495	1.10508	2.1511
RILPL2	AI810244	163.294	186.547	75.9227	1.10487	2.1508
TUBB6	BC002654	514.12	475.296	239.062	1.10472	2.15058
CHRFAM7A /// CHRNA7 /// LOC101929970	BF000203	1296.44	731.085	602.964	1.10441	2.15011
IER5	NM_016545	2903.22	1527.51	1352.29	1.10225	2.1469
PDGFC	NM_016205	121.009	60.3229	56.442	1.10028	2.14396
GRK5	NM_005308	2049.16	1112.73	956.153	1.09972	2.14313
HLA-C	AK024836	1668.81	1210.45	783.325	1.09114	2.13042
RPS27L	NM_015920	8316.59	5760.33	3904.19	1.09097	2.13017
METTL7A	NM_014033	1471.5	1084.93	691.997	1.08845	2.12645
TMEM108	BC000568	1486.06	768.675	699.565	1.08697	2.12427
ADAM23	BE674466	395.629	442.223	186.252	1.08689	2.12416
CCDC169	BC013944	160.033	163.971	75.3626	1.08645	2.12351
VCAN	D32039	2689.36	1452.5	1268.4	1.08425	2.12028
NXPE3	BF317081	433.654	343.24	204.815	1.08222	2.11729
SPATS2L	AK002064	5966.83	6417.29	2822.26	1.08011	2.1142
MAN1A1	BG287153	1157.21	836.338	547.549	1.07959	2.11343
PDE6D	AJ001626	1711.35	1111.83	810.252	1.0787	2.11213
ZCCHC24	AA131324	359.179	447.916	170.108	1.07825	2.11147
SIPA1L2	BC006013	254.425	213.814	120.626	1.0767	2.10921
ANXA5	NM_001154	2344.52	1464.72	1112.32	1.07572	2.10778
SNAI2	AI572079	429.241	415.51	203.772	1.07483	2.10647
DCLK1	AI129626	1194.27	1758.67	568.793	1.07016	2.09966
VCAN	BF590263	3734	2405.94	1778.99	1.06967	2.09895
DDAH1	AL078459	12135.8	7927.18	5786.27	1.06856	2.09734
NUDT17	AA481984	200.989	214.096	95.9502	1.06676	2.09472
SMIM13	AK058186	105.988	45.5872	50.618	1.06618	2.09388
UBE2F	AI040343	557.861	361.596	266.588	1.0653	2.0926
LGALS1	NM_002305	9450	6800.88	4518.12	1.06459	2.09158
ATRNL1	BC035157	212.533	294.889	101.654	1.06402	2.09075
FAM101B	AI961778	3223.27	3041.26	1543.67	1.06216	2.08805
ANXA4	BC000182	754.234	721.144	361.344	1.06164	2.08731
TTC7A	AB032966	229.34	166.452	109.914	1.06111	2.08654
COIL	BG391060	485.838	302.289	232.972	1.06032	2.08539
ADAM23	NM_003812	464.272	345.658	222.815	1.05913	2.08367
USB1	NM_024598	372.373	332.62	179.061	1.0563	2.07959
SDF2L1	NM_022044	906.866	556.374	436.519	1.05484	2.07749
CHD9	AW469037	187.526	147.95	90.2857	1.05452	2.07703
EDIL3	AA053711	124.598	293.245	60.0017	1.05421	2.07658
SYNGR2	NM_004710	760.109	623.514	366.343	1.05301	2.07486
EGR1	AV733950	463.572	553.447	223.847	1.05028	2.07093
MICALL1	W46406	798.283	526.999	385.941	1.04852	2.06841
DPH3	AI825858	767.19	703.255	371.245	1.04721	2.06653
DCUN1D1	R11899	364.02	323.776	176.214	1.04669	2.06578
PLPP3	AB000889	334.35	254.398	161.918	1.0461	2.06494
FOXCUT	AA424579	107.172	115.379	52.0076	1.04314	2.06071
CCDC85B	NM_006848	567.986	343.729	275.799	1.04224	2.05942
ST6GAL1	AI743792	145.19	241.354	70.5042	1.04216	2.05931
TFRC	NM_003234	11093.6	7026.64	5389.59	1.04148	2.05833
OLFML3	NM_020190	217.179	272.1	105.653	1.03955	2.05559
ENSA	BC000436	2202.33	1508.3	1071.8	1.03899	2.05479
NXPE3	BE883167	470.575	388.65	229.323	1.03704	2.05202
TRIB2	BC002637	2124.87	2268.07	1036.16	1.03613	2.05072
TSPAN8	NM_004616	567.523	312.012	276.85	1.03557	2.04993
LOC105369247 /// QPRT	NM_014298	3071.95	2624.74	1500.32	1.03388	2.04753
CLIC4	AF109196	711.761	496.508	347.735	1.03341	2.04685
LARS2	NM_015340	768.208	637.793	375.456	1.03285	2.04606
PLAT	NM_000930	577.796	620.01	282.686	1.03136	2.04395
WDR1	AF274954	1026.16	868.053	502.383	1.03039	2.04258
AGFG1	AI742626	560.259	404.111	274.298	1.03035	2.04252
NUBP2	NM_012225	573.072	400.623	280.584	1.03028	2.04242
CCNJL	NM_024565	322.293	371.778	157.802	1.03026	2.04239
PLXNA2	NM_025179	429.5	362.769	210.46	1.02911	2.04076
MBNL3	AW665447	252.263	141.976	123.663	1.02852	2.03993
VCAN	R94644	2816.09	1615.5	1381.37	1.02759	2.03862
STAT3	AA634272	1787.95	1334.79	877.616	1.02665	2.03729
IER5	BU678407	197.114	149.253	96.8053	1.02587	2.03619
ATP7A	NM_000052	1737.1	1536.02	853.404	1.02538	2.0355
NLGN1	NM_014932	195.446	270.791	96.1238	1.02381	2.03328
FXR1	R43158	507.549	412.065	249.842	1.02253	2.03148
STS	AI122754	344.473	236.649	169.61	1.02217	2.03097
PMAIP1	NM_021127	1857.79	1025.67	914.861	1.02196	2.03068
CHST11	AI123348	298.639	220.107	147.262	1.02002	2.02795
FDX1	M18003	1271.32	995.885	627.005	1.01978	2.0276
LRRN3	AL442092	1142.13	1199.13	563.481	1.01929	2.02692
TMEM150C	AU152102	128.916	116.051	63.6552	1.01808	2.02522
COLEC11	NM_024027	4701.32	4097.48	2326.29	1.01504	2.02095
ID2-AS1	AI042187	206.777	190.238	102.419	1.0136	2.01894
RARA	AI806984	829.33	557.17	411.991	1.00933	2.01298
TLE3	AI567426	437.266	338.307	217.345	1.00852	2.01185
GYG1	AF087942	782.903	690.654	390.062	1.00513	2.00712
APOBEC3C	AF165520	140.026	133.166	69.8008	1.00438	2.00609
RAB11FIP4	BF064276	516.654	422.407	257.698	1.00351	2.00488
PRNP	NM_000311	1316.78	613.845	656.812	1.00346	2.0048
IGFBP4	NM_001552	863.448	430.298	431.02	1.00236	2.00327
RASSF8	BG484552	1186.72	895.678	592.483	1.00213	2.00295

## Sheet: Downregulated
Gene Symbol	Representative Public ID	High B	Medium	Untransfected	Log2	Fold changes
CARTPT	NM_004291	68.809	63.3438	705.603	-3.35819	10.2545
TMEM100	NM_018286	139.837	766.939	1244.73	-3.15402	8.90131
AJAP1	AF052109	74.0477	216.012	531.03	-2.84227	7.17146
ID4	AL022726	20.7174	84.6521	141.054	-2.76733	6.80848
IGFBP7-AS1	AW243434	54.9669	142.003	348.075	-2.66277	6.33246
DLK1	U15979	3384.59	2852.64	20953.9	-2.63017	6.19099
HIF3A	BC026308	27.0611	105.174	154.404	-2.51241	5.70573
SLC8A1	AI741439	50.7291	185.656	289.378	-2.51207	5.70439
LOC101928307	AL833240	491.802	806.376	2734.91	-2.47534	5.56099
TXNIP	NM_006472	1545.39	2610.13	8462.1	-2.45304	5.47569
IGF2 /// INS-IGF2	X07868	1141.47	779.082	6234.12	-2.44929	5.46147
KIT	NM_000222	122.62	490.472	652.467	-2.41171	5.32104
SMURF1	AL137424	96.9914	155.586	514.489	-2.40721	5.30448
LOC101928307	AL833240	437.821	856.809	2297.32	-2.39154	5.24716
LPAR1	AW269335	350.934	708.836	1779.23	-2.34198	5.06999
RASAL2	AW242299	34.1621	95.3173	172.849	-2.33905	5.05968
TMEM178A	AA058832	57.7717	213.226	286.727	-2.31124	4.9631
LINC01105	NM_153011	79.0973	89.4934	376.938	-2.25263	4.7655
WNT2B	BF961733	48.7514	194.249	231.582	-2.248	4.75025
SEMA6A	AB002438	67.47	74.3408	320.45	-2.24778	4.74951
IGFBP7	NM_001553	56.1538	41.3965	257.876	-2.19922	4.59232
GRIA2	NM_000826	222.765	424.37	987.692	-2.14854	4.43378
AJAP1	AA835004	109.58	385.808	472.791	-2.10922	4.31457
DPY19L2	AA758751	194.412	360.677	837.358	-2.10673	4.30713
DMD	NM_004010	54.6453	80.5197	234.633	-2.10224	4.29375
TPT1-AS1	BE549656	71.2818	278.746	303.603	-2.09058	4.25919
LUC7L	AI744735	110.938	251.335	470.592	-2.08472	4.24194
MIR100HG	AW162210	94.786	458.338	396.901	-2.06603	4.18734
CEP295	AB051518	38.9774	98.7209	162.41	-2.05893	4.16678
VPS26A	AA004710	22.0865	67.8475	91.3542	-2.04831	4.1362
NPY2R	U32500	29.1066	42.394	119.944	-2.04294	4.12086
SGPP2	AA576959	47.2987	105.746	192.556	-2.02541	4.07107
USP13	AW295324	49.9705	156.904	201.448	-2.01126	4.03135
PDIA2	NM_006849	88.2018	282.962	355.544	-2.01115	4.03103
SPOCK1	AF231124	1624.57	1531.01	6511.89	-2.00302	4.00838
ZNF804A	AF052145	41.6753	70.8239	163.934	-1.97585	3.93359
LINGO2	AA430151	57.9359	79.4673	227.202	-1.97145	3.92161
SOX9	NM_000346	141.46	109.159	549.437	-1.95756	3.88404
IRX3	AI681917	1348.14	3416.15	5226.71	-1.95493	3.87698
TXNIP	AI439556	896.571	1316.42	3444.44	-1.94178	3.8418
TXNIP	AA812232	1074.09	1890.79	4085.93	-1.92755	3.80408
ZNF155	NM_003445	79.4494	122.527	300.351	-1.91854	3.78041
CNTN1	AW072790	164.913	377.209	613.405	-1.89513	3.71956
ERAP1	BE551138	65.2005	155.841	241.541	-1.88931	3.70459
ATP8B1	BG252666	696.377	1141.12	2538.83	-1.86622	3.64576
ANPEP	NM_001150	118.768	247.715	430.276	-1.85712	3.62283
KRBOX1	AA225165	40.8166	86.7595	147.459	-1.85309	3.61272
NXPH1	N62902	68.4308	84.9875	245.868	-1.84517	3.59295
CYP2C9	M21940	36.4871	90.8062	130.022	-1.83329	3.5635
SCAF11	AA679858	102.843	104.633	366.264	-1.83244	3.5614
LINGO2	AL353746	111.212	258.703	393.879	-1.82444	3.5417
TAS2R10	NM_023921	39.6322	100.139	138.81	-1.80837	3.50246
C14orf39	AL832219	86.9461	238.92	303.712	-1.80451	3.49311
VSNL1	NM_003385	48.1587	51.5317	166.685	-1.79126	3.46117
SNORA72	AI815001	83.7249	151.223	289.719	-1.79093	3.46037
CTC-338M12.4	NM_022907	168.243	408.422	578.152	-1.7809	3.43641
ACOT11	AB014607	87.2768	204.025	298.7	-1.77503	3.42244
SLC1A2	AL157452	294.194	441.989	991.535	-1.7529	3.37035
GOLGA8A	AF204231	1501.96	2981.48	5029.19	-1.74348	3.34841
ZNF826P	BC016785	203.6	215.579	677.669	-1.73484	3.32843
MYCN	BC002712	248.13	334.819	821.71	-1.72753	3.31161
GRIA2	BE219628	145.049	226.935	478.977	-1.72342	3.30218
HDAC9	BM726008	166.887	321.408	545.135	-1.70774	3.26649
ZNF117	BF107006	388.863	951.108	1267.17	-1.70428	3.25865
LOC105371472	N92599	78.9838	124.603	254.013	-1.68527	3.21601
SYTL4	AL391688	264.781	240.031	848.972	-1.68092	3.20632
LOC388692	AW515373	80.2611	135.054	256.783	-1.67778	3.19935
SPATA6L	H15396	36.7284	49.5793	115.788	-1.65652	3.15254
ZNF583	AL833236	28.6294	43.0652	89.5352	-1.64496	3.12739
EPB41L4B	AB032179	41.9286	67.332	131.073	-1.64436	3.12609
NHS	BF111819	286.717	259.366	894.496	-1.64145	3.11979
ADAMTS17	AA022668	84.4484	165.469	260.687	-1.62617	3.08693
GTSF1	BG150433	66.6957	92.0899	205.262	-1.6218	3.07759
LINC00893	AI692623	38.8738	92.4932	119.519	-1.62037	3.07455
DST	AL049215	31.1084	115.788	95.3563	-1.61602	3.06529
WDFY2	AK054833	65.377	128.506	199.266	-1.60784	3.04795
FAM228A	AW206421	92.9369	253.77	282.33	-1.60306	3.03786
ZNF362	AK021842	104.962	190.295	317.648	-1.59757	3.02632
LOC105375382	AA608964	62.5236	155.323	189.182	-1.5973	3.02577
ERICH1	AI761058	94.9386	231.649	286.599	-1.59397	3.01878
ID4	AW157094	172.92	409.546	520.776	-1.59056	3.01166
PDGFRA	NM_006206	2972.99	5248.59	8923.36	-1.58567	3.00148
EPCAM	NM_002354	83.1684	161.417	249.089	-1.58255	2.99499
TBC1D30	AW134976	171.704	340.65	513.347	-1.58001	2.98972
KLF9	NM_001206	76.8897	153.908	229.568	-1.57806	2.98569
PPP2R2B	AA974416	104.099	1073.56	310.627	-1.57723	2.98396
SDC2	BE048514	78.1125	220.81	232.811	-1.57554	2.98046
NEGR1	AI123532	30.9528	193.862	91.8646	-1.56944	2.9679
TIA1	BC015944	59.8408	150.909	177.541	-1.56895	2.96689
SLC18A1	NM_003053	1076.47	957.144	3191.73	-1.56803	2.96499
A2M-AS1	AK056852	118.16	237.321	349.186	-1.56325	2.95519
SCG5	NM_003020	1292.44	2150.45	3816.04	-1.56198	2.95259
FLJ41455	AA018404	48.3494	85.7725	142.613	-1.56053	2.94963
SPTLC2	U15555	41.0234	82.3926	120.756	-1.55758	2.94359
CXCR4	AJ224869	1015.53	1939.81	2986.95	-1.55644	2.94126
ABI3BP	AB056106	407.373	250.788	1196.92	-1.5549	2.93813
FZD7	NM_003507	1619.16	3995.27	4756.38	-1.55462	2.93756
TLE1	NM_005077	116.899	199.425	341.971	-1.54861	2.92536
SORBS1	AF136381	45.1979	67.1927	132.034	-1.54658	2.92124
COL4A1	AI922605	130.072	209.696	379.642	-1.54533	2.91871
AMY1A /// AMY1B /// AMY1C /// AMY2A /// AMY2B /// AMYP1	NM_004038	127.711	271.18	371.485	-1.54042	2.9088
PLAGL1	NM_002656	357.038	918.637	1037.01	-1.53828	2.90447
INSM2	AA046951	785.043	455.237	2279.4	-1.53781	2.90353
METTL6	AK027185	89.077	153.811	256.497	-1.52582	2.87949
TERT	NM_003219	52.8896	77.2158	151.33	-1.51664	2.86124
EED	AF099032	122.35	219.66	350.068	-1.51662	2.86119
IRX5	U90304	367.225	582.471	1046.45	-1.51077	2.84963
ID4	U16153	86.243	205.471	243.466	-1.49724	2.82302
UNC5A	R37358	424.47	424.635	1198.08	-1.49699	2.82254
LOC105371919	BE674305	104.035	145.387	293.642	-1.49699	2.82253
LOC285097	AK095698	29.3339	71.0758	82.5207	-1.49219	2.81315
PPWD1	AA767131	47.3368	102.764	132.814	-1.48837	2.80572
FLJ21369	NM_024802	30.7519	69.8965	86.2645	-1.48809	2.80518
RGS11	NM_003834	138.943	232.319	389.562	-1.48736	2.80375
PCDH9	NM_020403	165.832	578.92	464.851	-1.48704	2.80314
ZNF252P-AS1	AI092855	75.5456	107.649	211.734	-1.48684	2.80274
TLE1	AI758763	662.976	1493.82	1857.06	-1.48599	2.8011
FZD7	AI333651	621.438	1604.53	1740.07	-1.48546	2.80007
CRYGS	AI762135	45.7329	66.316	127.972	-1.48453	2.79826
FREM1	AI127440	46.808	135.295	130.976	-1.48447	2.79815
NBR1	BC012591	64.6343	103.646	179.614	-1.47453	2.77893
LEFTY1	NM_020997	94.7738	148.718	262.929	-1.47212	2.77428
ATP11A	AW068936	220.921	569.972	612.446	-1.47105	2.77224
ARHGEF10	AL137508	77.2807	94.4125	213.762	-1.46783	2.76605
TMCC3	N51717	53.6039	121.335	147.729	-1.46255	2.75594
PLCXD3	AL133721	1304.76	2055.04	3595.77	-1.46252	2.7559
BOC	W72626	69.1624	125.693	190.105	-1.45873	2.74867
ERI2	AI688141	32.9935	39.1992	90.5188	-1.45604	2.74354
RPH3A	NM_014954	347.548	376.821	952.741	-1.45487	2.74132
GATA3-AS1	AA846824	70.7358	134.751	193.839	-1.45434	2.74032
SEMA6A	AF225425	193.002	212.104	526.866	-1.44882	2.72985
ZNF608	AB033107	133.662	123.326	364.029	-1.44546	2.7235
SEMA5A	BG109855	417.18	720.155	1134.92	-1.44385	2.72046
DAPP1	NM_014395	188.638	308.644	512.583	-1.44217	2.71729
LOC441259 /// PMS2P1 /// PMS2P10 /// PMS2P5 /// PMS2P6	AB017005	70.1769	112.006	190.522	-1.44089	2.71488
NRAV	AW242904	137.327	352.117	369.243	-1.42696	2.6888
TANC2	NM_015623	452.411	433.261	1212.33	-1.42208	2.67972
AFAP1L2	AW138743	45.7618	105.559	122.441	-1.41987	2.67562
EFCAB3 /// LOC102724660	NM_173503	69.2871	122.83	185.367	-1.41972	2.67534
EPS15L1 /// LOC105372294	BF512299	63.9126	122.128	170.663	-1.41698	2.67026
HNRNPU	AI440495	1641.23	2751.01	4372.36	-1.41363	2.66407
GPATCH2L	AI761411	66.6883	127.19	177.046	-1.40862	2.65482
CCDC122	NM_144974	37.6668	48.2506	99.9911	-1.40851	2.65462
CDKN1C	N33167	928.27	1616.4	2462.49	-1.4075	2.65278
SORL1	AV728268	740.898	1298.21	1964.5	-1.40681	2.65151
HNRNPD	W74620	2428.53	3112.1	6437.75	-1.40648	2.65089
ZNF479	AF277624	38.2756	115.989	101.375	-1.4052	2.64855
AMH	NM_000479	614.468	730.545	1626.17	-1.40407	2.64647
TLE4	AA705845	139.171	223.264	368.031	-1.40297	2.64445
HDAC9	AW953794	390.734	683.301	1030.48	-1.39906	2.6373
UCN	NM_003353	214.168	263.696	564.747	-1.39886	2.63693
PRKAG2-AS1	AI949265	299.984	458.249	790	-1.39697	2.63348
TAMM41	AL136788	71.8864	155.767	188.861	-1.39353	2.62721
LOC101927636	BC029578	19.5896	35.8277	51.4529	-1.39317	2.62654
CIZ1	AA054734	54.5538	119.624	143.225	-1.39254	2.6254
HERC1	AW591969	60.7853	81.5215	159.468	-1.39148	2.62347
CLMN	AW028110	203.153	526.001	532.71	-1.39079	2.62222
ZMIZ1	AK025812	155.892	325.392	408.45	-1.38962	2.62009
RDH5	AI887702	217.318	263.337	567.666	-1.38524	2.61215
NFIB	U70862	527.656	1010.06	1377.59	-1.38448	2.61077
CXCR4	L01639	600.119	1411.08	1565.19	-1.38302	2.60813
TMEM232	AI027091	27.204	44.7214	70.9488	-1.38296	2.60803
PLCXD3	AI694325	1264.86	1968.18	3296.34	-1.38189	2.6061
SORBS2	AK000782	82.5838	99.7626	214.892	-1.37968	2.60211
SOBP	NM_018013	659.627	933.053	1715.92	-1.37926	2.60135
N4BP3	AW139448	78.0091	59.1557	202.513	-1.3763	2.59602
LOC101929709	H04388	68.5266	117.348	177.819	-1.37567	2.59488
ZC3H7B	NM_025013	939.453	1661.7	2435.31	-1.37421	2.59227
STAM-AS1	BF508153	77.5118	102.722	200.929	-1.3742	2.59223
TRIM73 /// TRIM74	BC033871	107.239	132.786	277.496	-1.37164	2.58764
PCDH9	R49295	216.413	605.892	559.452	-1.37023	2.58511
CDKN1C	R78668	430.057	488.119	1111.18	-1.3695	2.58381
PLEKHH2	AI913749	170.775	211.568	441.077	-1.36893	2.58279
ODF3B	BF436372	87.7542	218.194	226.27	-1.3665	2.57845
PCMTD2	BF509219	152.671	273.63	393.082	-1.36441	2.57471
DCLRE1C	NM_022487	646.134	1256.35	1662.91	-1.3638	2.57363
TANC2	BF115054	1637.53	1361.22	4204.11	-1.36028	2.56735
CDKN1C	NM_000076	523.126	866.719	1342.81	-1.36002	2.56689
KIZ	AI806322	241.88	462.629	618.117	-1.35359	2.55548
PRKCA	AI471375	881.631	2916.51	2249.29	-1.35122	2.55128
LOC101928521	AI376756	150.274	289.036	382.523	-1.34795	2.5455
LPAR1	BF055366	246.758	269.606	626.418	-1.34403	2.53859
RARS2	BG165118	65.5117	118.897	166.294	-1.34391	2.53838
ARMCX4	NM_152583	130.445	239.811	331.098	-1.34381	2.53821
CCDC18-AS1	AA524669	1191.07	1808.68	3011.26	-1.33811	2.52821
LOC439938	BF055480	67.2335	154.4	169.723	-1.33593	2.52438
USPL1	AL832776	55.8015	74.4912	140.708	-1.33433	2.52158
HNRNPH1	AI022387	159.795	277.771	402.824	-1.33392	2.52087
FER1L4	AF218012	219.779	379.514	553.291	-1.33198	2.51748
SLC25A27	AW779950	478.278	742.803	1203.82	-1.3317	2.51699
IL7	NM_000880	162.403	333.777	408.396	-1.33039	2.51471
FGFR1	AK024388	733.986	1035.62	1844.78	-1.32963	2.51338
DOC2B	AW451197	622.162	1385.79	1563.45	-1.32937	2.51293
GALT	AA453223	134.864	262.391	338.902	-1.32936	2.51291
BOK	BE614255	110.319	160.365	276.885	-1.3276	2.50986
NPL	AW119018	66.7311	79.4227	167.399	-1.32686	2.50856
ZNF503	AA603467	670.11	1679.17	1680.97	-1.32683	2.5085
CNTN1	U07820	132.621	221.17	332.547	-1.32625	2.5075
FAM19A4	AA757457	45.2354	171.549	113.042	-1.32134	2.49898
ARRDC4	AV701177	323.902	548.528	808.393	-1.3195	2.49579
KCNQ5	BF513800	97.0893	53.2905	242.25	-1.31912	2.49513
SEC16B	BC009106	48.8112	120.367	121.52	-1.31591	2.48959
ITGA2B	NM_000419	108.323	150.008	269.565	-1.31529	2.48853
N4BP2L2	BG545582	121.216	175.015	301.287	-1.31356	2.48554
LOC100507283	AL833383	109.677	175.849	272.471	-1.31284	2.4843
C7orf73 /// LOC105375521 /// SLC13A4	BE018269	110.414	209.027	274.207	-1.31234	2.48344
KIF6	T19133	30.4995	75.4894	75.7409	-1.31229	2.48335
FMOD	NM_002023	59.2736	121.517	147.167	-1.31199	2.48284
ODF3B	AW139261	116.295	208.793	288.64	-1.31148	2.48197
KLHL5	AK001836	79.3683	109.707	196.942	-1.31113	2.48136
MIAT	BF475488	1438.53	2841.31	3568.23	-1.31062	2.48048
AQP1	AL518391	144.299	92.0403	357.529	-1.309	2.4777
FAM49A	AI934342	80.9214	107.116	200.371	-1.30808	2.47612
DRC3	NM_031294	115.641	237.144	286.208	-1.30742	2.47498
TIMP3	NM_000362	371.516	523.348	919.481	-1.3074	2.47494
SLF1	AA973100	115.878	159.12	286.413	-1.30549	2.47167
TLE1	BE302305	209.133	393.51	516.113	-1.30327	2.46787
PDE10A	AI143879	263.073	278.664	648.855	-1.30243	2.46644
ICA1	W67992	468.782	602.215	1154.99	-1.30089	2.46381
LOC441204	R54953	73.6045	234.122	181.149	-1.29931	2.46111
PPIEL	BF511556	194.594	238.762	477.318	-1.29448	2.45289
HGSNAT	BE327420	40.4024	116.573	99.0968	-1.2944	2.45274
TPM2	AL566786	99.9334	164.845	244.931	-1.29334	2.45095
GTF2IP20 /// LINC01061 /// LOC101927097 /// LOC729218	AK024248	346.644	682.735	849.483	-1.29313	2.45059
LOC728715 /// OVOS /// OVOS2	AW594320	673.438	603.001	1649.23	-1.29218	2.44897
LOC105379232	AI401627	140.181	430.555	342.868	-1.29036	2.4459
TTC14	AA703326	284.916	510.286	696.678	-1.28995	2.4452
LEPR /// LEPROT	BC036581	42.6618	59.3711	104.268	-1.28927	2.44405
CCSER1	AB051467	105.697	90.8755	258.233	-1.28874	2.44315
NAALAD2	BC038840	84.177	30.6936	205.376	-1.28677	2.43982
DPY19L2	AI039361	214.183	250.591	521.573	-1.28402	2.43517
G3BP1	AA026297	167.945	220.714	408.688	-1.28301	2.43346
GDF10	NM_004962	415.934	478.01	1008.84	-1.27828	2.42549
METTL9	AI536637	163.245	232.527	395.505	-1.27666	2.42277
LINC00894	U66046	121.092	187.404	293.317	-1.27635	2.42226
IGFBP5	AW007532	170.726	329.523	413.292	-1.27548	2.4208
RGMB	BE855765	837.954	953.442	2027.85	-1.27501	2.42001
ZNF83	M27877	709.085	932.869	1715.6	-1.27468	2.41945
ZMAT1	AI741051	480.935	765.024	1160.27	-1.27054	2.41253
GRIA3	AW294729	107.616	415.246	258.953	-1.26679	2.40626
PHLDA1	AI795908	89.3629	92.1478	214.161	-1.26095	2.39653
HDAC9	AC004744	106.129	176.651	254.025	-1.25915	2.39354
KLHL8	BC041370	91.974	156.246	220.072	-1.25867	2.39276
LOC100147773	AA039844	78.0201	120.318	186.653	-1.25844	2.39236
PUS10	BF514791	28.1049	64.4776	67.2212	-1.2581	2.3918
SLC7A8	AL365347	83.8632	124.465	200.462	-1.25722	2.39035
KAT6B	AL832065	158.056	263.913	377.706	-1.25683	2.3897
BCAR1	AU147442	49.6421	108.534	118.508	-1.25535	2.38725
TBC1D30	AL050074	60.4744	110.855	144.3	-1.25467	2.38613
C1orf226	AA129774	289.71	337.177	691.281	-1.25466	2.38612
GPATCH4	NM_015590	62.7513	116.565	149.683	-1.25419	2.38533
ZFP36L1	BG250310	44.1885	64.916	105.312	-1.25294	2.38326
HFE	AF149804	48.3087	69.0822	114.952	-1.25068	2.37954
LOC102724449	BC041449	55.0074	122.195	130.842	-1.25013	2.37863
LOC102723927	BE219874	41.4725	66.7465	98.5299	-1.24841	2.37579
UQCC2	AW294606	168.8	223.435	400.954	-1.24812	2.37531
MUC20	AI168678	91.1859	209.231	216.434	-1.24704	2.37355
CADPS	BE467579	46.3726	170.146	109.941	-1.24538	2.37081
CXCR4	AF348491	661.549	1429.35	1566.06	-1.24322	2.36726
TNFRSF25	NM_003790	552.884	829.194	1308.69	-1.24308	2.36703
NPEPL1	AA398062	51.1157	65.4701	120.737	-1.24003	2.36203
NACA	AI992187	539.035	655.946	1271.96	-1.2386	2.3597
PLCE1	NM_016341	30.4103	45.7549	71.749	-1.2384	2.35936
C1orf27	W72877	52.6667	114.102	124.187	-1.23755	2.35798
GNRH1	NM_000825	102.029	140.493	240.376	-1.23632	2.35596
ZNF718	CA411757	30.4836	33.997	71.7952	-1.23585	2.35521
DBF4B	AW290902	45.7388	76.359	107.703	-1.23557	2.35474
GALNT15	BF055343	34.7189	52.4424	81.7264	-1.23508	2.35395
PABPC1L	AK026760	235.822	363.344	554.843	-1.23438	2.35281
KCNMA1	U11058	196.959	414.801	463.323	-1.23412	2.35238
ANK2	AK021894	98.7361	142.575	231.639	-1.23023	2.34605
MSS51	BE674227	116.574	189.43	273.463	-1.2301	2.34583
MIAT	R54042	1417.84	2937.75	3318.86	-1.227	2.34079
HFM1	AA463509	146.183	198.982	341.995	-1.2262	2.33951
PRLR	AA843963	33.1292	51.0774	77.4897	-1.2259	2.33902
KIFC2	BF515031	686.992	1093.19	1604.46	-1.22372	2.33548
KIAA1217	AL157473	54.9666	83.7345	128.369	-1.22367	2.3354
NUMBL	BE350811	1948.58	5152.31	4549.4	-1.22325	2.33472
ADM	NM_001124	319.106	1093.69	744.969	-1.22315	2.33455
SORD	AV699883	621.35	1017.56	1450.24	-1.22282	2.33402
GSDMB	NM_018530	214.846	334.953	501.027	-1.22158	2.33202
LOC105369360	AA524609	347.998	734.552	810.446	-1.21964	2.32888
ZCCHC4	NM_024936	120.801	232.608	281.283	-1.2194	2.32849
LOC441242	AW513654	476.156	688.076	1108.51	-1.21911	2.32804
DDI2	BC006011	70.8019	126.125	164.817	-1.219	2.32786
GRM8	AC000099	78.1547	85.7839	181.188	-1.21308	2.31832
EPB41	NM_018575	42.718	73.4169	98.999	-1.21257	2.3175
CALM1 /// CALM2	BF526558	66.6621	125.279	154.4	-1.21173	2.31616
CRIPT	BF514509	691.856	1051.98	1602.42	-1.21171	2.31611
SDCCAG8	BG531853	366.451	649.282	848.447	-1.2112	2.31531
LOC101927268 /// LOC102724851 /// LOC105374994	AA766296	198.233	395.297	458.912	-1.21102	2.31501
CPPED1	NM_018340	126.511	148.923	292.772	-1.21051	2.3142
C3orf67	AA521262	104.839	133.942	242.606	-1.21043	2.31407
LOC101928476	BC043293	53.989	96.7417	124.906	-1.21011	2.31355
SRSF4	AV647470	33.7341	68.6134	78.0363	-1.20994	2.31328
NEUROD1	CA778002	76.2083	107.692	175.946	-1.20712	2.30876
GPR155	AI970061	230.494	607.193	532.033	-1.20679	2.30823
ZNF404	AA084273	263.72	326.638	607.855	-1.20472	2.30492
LOC105379809	AL050039	45.2659	55.9032	104.279	-1.20395	2.30369
C7	NM_000587	5749.96	13702	13240.8	-1.20337	2.30276
SP110	AF280094	37.8029	104.926	87.0442	-1.20325	2.30258
FAM84A /// LOC653602	AI378035	589.202	1128.22	1352.72	-1.19903	2.29585
LOC102724275	AA678564	441.675	572.697	1013.27	-1.19796	2.29415
ANKRD36 /// ANKRD36B	AB046861	257.168	428.388	588.751	-1.19494	2.28936
SCPEP1	AK092928	115.866	246.761	265.149	-1.19435	2.28842
LOC401320	AK096687	264.44	568.45	604.785	-1.19348	2.28704
C1orf228	AI638342	127.03	190.72	290.521	-1.19347	2.28703
AGTR1	NM_000685	48.94	156.218	111.788	-1.19167	2.28418
CNTN1	AI091445	566.776	1185.27	1294.29	-1.1913	2.28359
AJAP1	NM_018836	133.28	199.853	304.242	-1.19075	2.28272
CAND1	N21434	178.866	252.738	407.988	-1.18965	2.28097
SLC16A10	AI935541	38.5754	24.1501	87.9492	-1.18899	2.27993
LOC101927055 /// TTN-AS1	AK093733	352.454	633.148	802.874	-1.18774	2.27795
EIF1	AL516854	92.1107	235.393	209.47	-1.1853	2.27411
LINC01234	AK096932	84.0255	129.705	191	-1.18468	2.27312
VEGFA	H95344	622.936	604.921	1415.68	-1.18434	2.2726
TARBP1	NM_005646	1128.41	1312.33	2563.78	-1.18398	2.27203
SLCO1A2	NM_021094	66.7345	91.3326	151.533	-1.18313	2.27068
TMEM145	NM_173633	193.118	236.083	437.735	-1.18058	2.26668
DNHD1	AI911330	155.143	269.086	351.523	-1.18002	2.2658
SERPING1	NM_000062	106.266	273.961	240.539	-1.1786	2.26357
LINC01004	AW148862	535.823	841.538	1211.78	-1.1773	2.26154
TRMT10B	AV728846	84.0113	112.033	189.828	-1.17604	2.25956
P2RX7	NM_002562	75.6945	98.1071	170.962	-1.17541	2.25858
ODF2L	AB033055	170.906	335.671	385.871	-1.17491	2.25779
TLE4	AL358975	200.935	330.702	453.587	-1.17465	2.25738
DMXL1	N74444	210.036	356.049	474.094	-1.17454	2.2572
PLAGL1	NM_006718	306.471	863.279	690.821	-1.17256	2.25412
MPZL1	AF181660	246.426	457.649	555.328	-1.17219	2.25353
PRKAR1A	AI682905	188.215	278.793	423.539	-1.17011	2.25029
SHC3	AL133705	52.106	80.0335	117.254	-1.17011	2.25029
MCAM	M28882	277.613	252.647	624.661	-1.17	2.25011
DYNC2LI1	AA947051	280.687	509.946	630.656	-1.16789	2.24683
SEMA3F	U38276	187.539	206.613	421.003	-1.16664	2.24489
LOC105374419	BC040333	42.7975	75.2059	96.0592	-1.1664	2.2445
MAATS1	AB063298	154.616	219.17	346.678	-1.16491	2.24219
GPR180	AF339823	56.3464	110.291	126.309	-1.16457	2.24166
ZSCAN30	BF431973	365.195	571.45	817.804	-1.16309	2.23936
ZAR1	AY191416	99.778	157.738	223.211	-1.16162	2.23708
FJX1	NM_014344	172.692	281.766	386.319	-1.16159	2.23704
HDAC9	NM_014707	641.202	967.599	1434.27	-1.16146	2.23684
MDM4	NM_002393	292.944	475.432	654.639	-1.16008	2.23469
TMEM74B	NM_018354	380.666	768.942	849.513	-1.15811	2.23165
MAGI1	AF401655	102.139	174.339	227.864	-1.15764	2.23092
YPEL2	AW005748	117.725	264.298	262.62	-1.15755	2.23078
TMEM161B	AA213701	418.149	518.125	932.774	-1.15751	2.23072
PLD5	R38585	86.3518	408.991	192.371	-1.15559	2.22776
PCDHA9	NM_014005	83.0682	126.846	184.879	-1.15421	2.22563
C5orf63	BE674694	110.565	107.394	246.055	-1.15409	2.22544
P2RX7	AI655467	238.741	234.103	531.13	-1.15362	2.22471
KIF26B	AW207243	1085.83	1481.61	2415.26	-1.15338	2.22434
SULF2	AL034418	212.227	168.939	471.799	-1.15257	2.22309
MACROD1	AL833017	93.112	128.817	206.945	-1.15221	2.22254
TNFAIP8L1	NM_017932	1620.77	2640.29	3600.31	-1.15144	2.22136
MED28	N64630	318.901	451.774	707.534	-1.14969	2.21867
LOXL2	NM_002318	134.793	194.508	299.047	-1.14962	2.21856
COPA	AI621079	74.7678	83.4808	165.855	-1.14943	2.21827
ATXN3	U63332	48.4004	144.144	107.345	-1.14916	2.21785
CDKN1C	D64137	496.057	490.838	1099.62	-1.14843	2.21672
PARD6B	AW151704	191.448	334.974	423.854	-1.14662	2.21394
ZNF577	AI926145	30.1452	105.63	66.692	-1.14558	2.21236
PLAGL2	AL562280	60.2732	133.041	133.275	-1.14482	2.21119
SULF2	AL133001	699.978	565.232	1547.27	-1.14434	2.21045
C15orf40	AI821995	84.5748	129.167	186.875	-1.14378	2.20959
LTV1	AW236214	122.002	196.507	269.542	-1.1436	2.20932
VEGFA	AF022375	3029.32	2366.92	6692.1	-1.14347	2.20911
AHSA2	AL050376	484.409	651.926	1069.29	-1.14235	2.2074
PRTG	AV699825	343.303	455.102	757.445	-1.14166	2.20634
AGBL3	AI674787	182.163	326.257	401.855	-1.14144	2.20601
SNAP25	AI806346	869.022	1202.15	1916.72	-1.14118	2.20561
LOC101927027	BF526066	57.047	91.8494	125.781	-1.14069	2.20487
LOC100134317 /// LOC284412	AI936524	49.4277	125.35	108.964	-1.14046	2.20451
SNRK-AS1	BF434212	150.827	248.674	332.446	-1.14022	2.20415
MIAT	AI914323	371.013	761.902	817.062	-1.13898	2.20225
MGA	AL713737	101.35	163.197	223.179	-1.13885	2.20205
CHCHD3	AA047225	81.2315	116.15	178.836	-1.13853	2.20156
NFIA	AW022607	195.376	663.237	430.039	-1.13821	2.20108
CHD2	AA709148	335.447	502.395	738.277	-1.13808	2.20087
ATG10	BC018651	114.924	213.568	252.847	-1.13758	2.20012
LAMA4	AK027151	32.8566	53.6127	72.2616	-1.13705	2.1993
ZNF24	AA749167	126.351	241.743	277.796	-1.13659	2.19861
POLR2J2	AW615396	157.822	250.859	346.979	-1.13655	2.19855
ICA1	NM_022307	1741.87	1702.69	3827.7	-1.13585	2.19747
LOC105369889	BF196060	359.245	554.708	788.597	-1.13432	2.19515
AIG1	N62827	129.208	164.358	283.395	-1.13312	2.19332
NEDD9	AW291077	51.1458	135.811	112.175	-1.13306	2.19323
PRR11	NM_018304	3161.93	5192.27	6927.97	-1.13163	2.19106
ZNF620	BG289896	26.5518	52.0344	58.1631	-1.13129	2.19055
LINS1	BC010363	301.938	343.954	660.449	-1.1292	2.18737
PIGL	AL832404	85.8949	144.478	187.79	-1.12848	2.18628
NHLRC3	N25548	736.92	1382.45	1610.97	-1.12835	2.18609
BICC1	NM_025044	81.7198	173.317	178.563	-1.12767	2.18506
RNF150	N50714	2000.87	2783.69	4371.79	-1.1276	2.18495
WBP2NL	NM_152613	88.7974	175.383	193.935	-1.12698	2.18401
ATP2B2	R52647	229.237	454.599	500.497	-1.12652	2.18331
LOC401261	AU148141	131.683	213.742	287.402	-1.126	2.18253
FBXO16 /// ZNF395	AK021850	284.445	461.631	619.569	-1.12311	2.17817
TRIM73	BC033812	607.089	806.615	1321.26	-1.12194	2.17639
SRSF1	AI803504	256.721	344.999	558.396	-1.12109	2.17511
SLC38A10	BF663461	934.105	942.471	2027.08	-1.11774	2.17007
XIST	AA628440	7398.3	12608.2	16047.5	-1.11708	2.16908
ELAVL2	NM_004432	279.569	713.075	606.216	-1.11663	2.16839
RPLP2P1	AL133267	79.2435	73.9129	171.799	-1.11636	2.16799
MYCL	M19720	131.595	287.281	285.269	-1.11622	2.16779
LAS1L	AL042052	118.665	284.017	257.123	-1.11557	2.1668
LOC100134822	AL137655	507.387	654.765	1098.64	-1.11457	2.1653
LINC00969	CA418406	406.324	620.204	879.386	-1.11387	2.16425
SENP7	AL136599	959.191	940	2074.83	-1.1131	2.1631
CYP1B1	AU154504	147.581	171.444	319.031	-1.11219	2.16174
N4BP2L1	N80918	740.077	790.434	1599.43	-1.11181	2.16117
ADGRA3	BC020926	172.066	294.465	371.531	-1.11052	2.15923
ARPP21	AL133109	259.472	237.946	559.835	-1.10942	2.15759
SHISA3	AI735586	23.0507	75.6071	49.7316	-1.10935	2.15748
ZNF664	BC033539	194.329	489.311	418.905	-1.10812	2.15565
SMIM14	AW974915	79.4514	119.345	171.238	-1.10786	2.15525
HELZ	AA761673	60.0003	80.3308	129.225	-1.10684	2.15374
USP33	AK023664	54.6715	47.2613	117.659	-1.10575	2.15211
SRP19 /// ZRSR1	NM_005083	100.947	120.988	217.007	-1.10415	2.14972
SORL1	NM_003105	672.927	897.518	1445.99	-1.10353	2.1488
SFRP1	NM_003012	596.995	932.701	1282.82	-1.10353	2.1488
LOC101929713	AI800806	65.8281	62.4072	141.424	-1.10325	2.14839
NSUN5P1 /// NSUN5P2	N29665	2169.61	3226.16	4657.65	-1.10217	2.14677
GOSR2	AW205003	134.931	126.147	289.605	-1.10186	2.14632
FRG1BP	AI681945	70.9564	111.078	152.139	-1.10039	2.14412
SNRPB2	BE466925	133.41	202.73	286.039	-1.10034	2.14406
ME3	NM_006680	142.879	217.518	305.851	-1.09804	2.14063
CTAGE5	NM_005930	55.6521	78.9435	119.085	-1.09749	2.13982
ZNF117	AW058673	1168.98	1513.79	2497	-1.09494	2.13604
LOC692247	BG772667	621.502	1637.81	1327.53	-1.09491	2.136
WDR37	BC018044	93.9561	245.616	200.6	-1.09427	2.13504
LOC399900	AK093779	37.0058	82.9879	79.0058	-1.09421	2.13495
RPL5	AA582460	67.737	103.81	144.521	-1.09326	2.13356
PREPL	BF445273	52.9969	91.2017	113.026	-1.09268	2.1327
ACSF3	AI763000	63.7398	130.622	135.856	-1.09181	2.13141
SYCE1L	AL512697	171.85	248.726	366.119	-1.09117	2.13046
GON4L	NM_025174	319.531	536.234	680.63	-1.09091	2.13009
LOC441204	AA406397	143.059	203.97	304.557	-1.0901	2.12888
ADAT2	AA706895	98.4402	146.31	209.488	-1.08954	2.12807
RBM6	AI041522	766.527	951.617	1628.81	-1.08741	2.12492
LEPR	U50748	510.093	521.765	1083.76	-1.08722	2.12464
WDR17	NM_170710	73.2579	129.767	155.516	-1.08601	2.12285
PLCH1	AW665865	72.2001	129.269	153.245	-1.08577	2.12251
SIRT2	BG722779	51.4462	163.618	109.148	-1.08516	2.12161
GPR155	AW449728	269.292	436.026	571.07	-1.0845	2.12063
ANP32A-IT1	NM_024970	74.4887	124.411	157.919	-1.08409	2.12004
DNAJC13	BC043583	61.5789	101.013	130.535	-1.08392	2.11979
ZNF492	AB040906	207.392	192.21	439.609	-1.08386	2.1197
RHOXF1	AY099086	110.156	167.827	233.49	-1.08382	2.11963
ZNF471	AA461597	103.148	170.479	218.592	-1.08353	2.11922
POU2F2	BF509229	68.9905	81.4172	146.126	-1.08274	2.11806
LPAR1	NM_001401	234.03	263.228	495.5	-1.08219	2.11725
XIST	AV699347	3477.84	5692.17	7359.25	-1.08137	2.11604
MED6	NM_005466	464.931	726.261	983.711	-1.08122	2.11582
SLIT1	AB011537	1276.19	1594.99	2699.51	-1.08085	2.11528
ATP6	AI535835	358.516	744.659	757.944	-1.08005	2.11411
ADAM21	NM_003813	146.825	220.43	310.319	-1.07965	2.11353
BRWD1	AW183692	108.925	181.192	229.974	-1.07813	2.1113
SHISA5	BC001463	414.949	1303.35	875.467	-1.07712	2.10982
MIR99AHG	N66393	264.605	531.878	556.934	-1.07367	2.10477
ZNF485	NM_145312	116.934	150.791	245.895	-1.07234	2.10285
ANKRD6	BE677131	797.326	1172.56	1676.13	-1.07189	2.10218
CXCL1	NM_001511	40.4396	54.7909	84.9876	-1.07148	2.10159
CBR4	NM_032783	719.921	1176.73	1512.85	-1.07136	2.10141
C1orf132	AI927692	168.375	341.572	353.738	-1.07101	2.1009
SPAG4	NM_003116	290.342	287.103	609.912	-1.07085	2.10067
CSTF3	AI653037	1145.45	1386.62	2405.45	-1.07039	2.10001
FBXO43	BG391951	182.277	150.57	382.743	-1.07024	2.09979
AUTS2	AI417756	134.084	231.754	281.534	-1.07017	2.09968
ATP11A	BF439472	43.824	85.1541	92.013	-1.07012	2.0996
MGAT3	AI681914	59.2416	73.7234	124.231	-1.06834	2.09702
IGF2R	BC010121	64.9945	126.942	136.16	-1.06691	2.09495
LRRFIP1	AK023938	104.9	305.345	219.705	-1.06656	2.09443
NASP	AU144734	1813.49	1986.75	3797.96	-1.06646	2.09428
ISYNA1	AI675636	73.4491	103.029	153.765	-1.06591	2.0935
ZMYM2	AL136621	226.682	356.763	474.384	-1.06538	2.09273
ARL17A /// ARL17B /// LOC100294341 /// LOC100996709	AF119889	134.241	170.212	280.799	-1.06471	2.09175
ASIC1	U78181	178.215	369.644	372.686	-1.06434	2.09121
LMNA	BF701384	54.2716	83.7747	113.48	-1.06417	2.09096
LPCAT4	AA702500	380.051	556.019	793.949	-1.06285	2.08906
LOC100133315	AU144503	322.668	443.465	674.022	-1.06274	2.0889
LINC00328	NM_016181	139.631	248.854	291.476	-1.06175	2.08747
CBX3P2	BC018088	38.1221	49.2285	79.518	-1.06065	2.08588
MYNN	AI939472	52.1181	75.593	108.653	-1.05987	2.08474
STK3	Z25422	39.204	35.9393	81.7294	-1.05986	2.08472
TNFRSF25	U94510	351.967	523.782	733.493	-1.05934	2.08398
TAMM41	AW969235	88.9813	141.302	185.415	-1.05919	2.08376
CCDC144NL-AS1 /// LOC105369205 /// LOC339260	BC043529	159.688	261.898	332.73	-1.05909	2.08362
C11orf54	CA446227	54.7448	129.449	114.047	-1.05884	2.08325
ELF2	T85294	490.572	788.724	1021.85	-1.05865	2.08299
C22orf39	AA194312	132.72	176.793	276.376	-1.05825	2.0824
MRAP2	AA418816	493.746	1811.47	1028.03	-1.05804	2.08211
HOXD4	NM_014621	221.627	276.427	461.387	-1.05784	2.08182
LOC100129406	AI021983	165.187	333.275	343.803	-1.05748	2.08129
AP1G2	BC000519	951.248	1553.1	1977.69	-1.05592	2.07905
ADGRB2	NM_001703	716.115	998.12	1488.7	-1.05579	2.07886
DCP2 /// LOC105379125	AA504595	342.877	481.776	711.433	-1.05304	2.07489
KMT2A	AA704766	716.423	1084.46	1485.91	-1.05246	2.07406
RALGAPA1	AB020691	107.501	180.067	222.945	-1.05233	2.07388
MAP3K8	NM_005204	43.2683	54.7397	89.6769	-1.05143	2.07258
SORBS2	BC035329	144.731	176.789	299.842	-1.05083	2.07172
TTC9B	AW298160	309.817	482.671	641.418	-1.04985	2.07031
ARHGEF7	AI040887	218.326	360.738	451.357	-1.04779	2.06736
C1QTNF3	NM_030945	321.546	515.015	664.345	-1.04691	2.0661
LOC100653233	AL133656	86.1765	94.3513	178.047	-1.04689	2.06607
GOLGA8A /// GOLGA8B	AF164622	1729.49	2609.68	3570.96	-1.04597	2.06475
DHFRL1	AA578546	644.072	1155.43	1329.45	-1.04554	2.06414
CNTN4	R42166	220.221	352.13	454.382	-1.04495	2.0633
RHOT1	AL136929	67.4772	128.532	139.184	-1.04452	2.06268
LOC102724275 /// LOC102725134 /// LOC105369228	AI469960	2513.05	3844.09	5182.04	-1.04408	2.06205
EMC3	AU147317	69.2932	120.852	142.88	-1.04402	2.06196
SYCP2L	BF590345	129.927	160.867	267.893	-1.04396	2.06188
SEMA5A	BF940761	199.358	379.944	410.895	-1.04341	2.06109
FUT9	AA017721	1171.51	1778.13	2413.67	-1.04286	2.06031
LRP2BP	NM_018409	244.433	415.653	503.296	-1.04197	2.05904
TFAP2E	BC041175	205.389	294.48	422.766	-1.0415	2.05837
MCPH1-AS1	R45298	66.0182	88.969	135.873	-1.04133	2.05812
ZNF496	AK098030	194.441	275.849	400.044	-1.04083	2.0574
ARMCX4	AK096955	117.465	178.522	241.562	-1.04017	2.05647
LOC389834	BF109197	364.534	585.331	749.599	-1.04006	2.05632
CCDC136	AI678057	537.509	833.96	1104.18	-1.03861	2.05425
FRG1 /// FRG1BP /// FRG1CP /// FRG1EP /// LOC101930531 /// LOC102724813	AI369073	891.574	1398.46	1830.72	-1.03799	2.05336
HNRNPM	AK024911	88.4882	146.524	181.648	-1.03759	2.0528
KRT25	AI150703	43.064	63.512	88.3261	-1.03636	2.05104
AVIL	AI610347	95.5995	102.074	195.996	-1.03575	2.05018
LINC01410 /// LOC105379818	AA521080	231.559	360.569	474.699	-1.03563	2.05001
LOC101926967	AW205474	152.665	312.506	312.858	-1.03514	2.04931
MCPH1	N21605	118.29	189.451	242.322	-1.03459	2.04854
LOC285097	AK095698	132.578	278.866	271.382	-1.03349	2.04696
WNT2B	BE220209	119.701	224.255	244.915	-1.03285	2.04606
SCARNA17 /// SNHG22	AI300126	69.5391	100.184	142.258	-1.03261	2.04573
ALAD	BC000977	335.162	431.675	685.608	-1.03253	2.0456
PTGR2	BE465894	189.644	439.18	387.933	-1.03251	2.04559
HSPB11	AV700696	339.945	404.976	695.216	-1.03216	2.04509
TMEM56	AA054642	220.069	226.346	449.873	-1.03156	2.04424
N4BP2L2	BG548427	222.803	347.993	455.072	-1.03032	2.04248
SMC3	AL360194	97.8498	126.028	199.796	-1.02989	2.04186
ADCYAP1R1	AW451961	199.55	216.689	407.434	-1.02981	2.04176
AKAP10	AU147278	277.737	535.68	566.952	-1.02951	2.04133
PRKAA1	AK024252	268.478	425.723	547.579	-1.02826	2.03957
WNK3	AY082340	61.2238	148.266	124.784	-1.02727	2.03817
LINC00599	AL832535	747.129	1201.97	1522.64	-1.02714	2.03798
ALDH8A1	NM_022568	47.2418	106.223	96.2415	-1.02659	2.03721
TNIK	AF172268	101.548	260.271	206.758	-1.02579	2.03607
MAATS1	AB063297	269.754	306.518	548.847	-1.02476	2.03462
AHSA2	AI831431	102.925	113.431	209.402	-1.02468	2.03451
SH3BP5-AS1	AI123416	306.397	408.371	623.121	-1.02411	2.0337
WDR27	AI016894	809.574	1033.34	1644.68	-1.02257	2.03154
TTC14	AL040341	1606.5	2243.76	3263.08	-1.02231	2.03117
KIAA0754 /// MACF1	AW663712	249.262	388.206	506.245	-1.02217	2.03097
ARHGEF10	BC040474	191.823	248.311	389.432	-1.02159	2.03016
C7orf73 /// SLC13A4	AW007221	136.477	226.308	276.979	-1.02112	2.02949
CEP41	R45176	189.835	267.03	385.216	-1.02092	2.02922
LOC200830	C14358	30.1611	52.9009	61.1951	-1.02073	2.02894
POU2F2	AI703496	188.946	277.744	383.359	-1.02072	2.02893
PNISR	AA902326	3036.34	3743.32	6159.24	-1.02042	2.02851
TRMT10B	AI214944	406.803	516.912	824.623	-1.0194	2.02708
LOC100505874	AU146017	936.386	1214.51	1896.41	-1.01809	2.02524
ANKRD33	BF590315	73.0599	137.361	147.936	-1.01782	2.02486
AHSA2	AI986239	814.003	1008.53	1647.92	-1.01754	2.02446
SLC22A3	AV699746	437.529	778.948	885.156	-1.01655	2.02308
GPR173	AW150212	172.571	255.75	349.086	-1.01639	2.02285
RIMKLB	AW102570	138.18	160.422	279.359	-1.01557	2.0217
TNKS1BP1	AL566438	109.494	142.213	221.312	-1.01523	2.02123
RPL23AP32	NM_020217	527.092	839.6	1065.16	-1.01494	2.02082
EPB41L4B	NM_019114	150.088	191.342	303.259	-1.01475	2.02055
GLCCI1	AC006042	1799.81	1874.6	3634.94	-1.01409	2.01963
CAMK1	AL041824	226.285	346.118	456.903	-1.01375	2.01915
HESX1	U82811	72.9719	147.586	147.222	-1.01258	2.01752
EVL	T58044	420.315	631.474	847.742	-1.01215	2.01692
DPP10	AL538781	308.963	311.298	623.024	-1.01185	2.0165
MXRA8	AW888223	288.969	309.267	581.667	-1.00928	2.0129
RPS6KA6	H88112	230.81	237.794	464.482	-1.00891	2.0124
SYNE2	BE673396	112.284	157.474	225.94	-1.00879	2.01222
LOC105375978 /// ZDHHC21	AK026322	286.863	493.024	577.067	-1.00837	2.01164
DIAPH2	NM_007309	101.721	110.575	204.559	-1.00789	2.01097
CCNL2	AF251294	5917.3	8163.47	11897.7	-1.00768	2.01067
PROM2	NM_144707	119.121	213.309	239.416	-1.00709	2.00986
RECQL5	BC042989	73.1447	89.148	147.002	-1.00701	2.00974
GRIK5	S40369	125.841	190.945	252.863	-1.00675	2.00938
POGZ	AK000199	1360.4	1765.02	2732.2	-1.00603	2.00837
LRRC39	BF111992	159.792	248.843	320.744	-1.00523	2.00726
POU2F2	T99553	95.6354	180.371	191.884	-1.00462	2.00641
LOC100291323	BC030635	324.371	421.601	650.609	-1.00415	2.00576
PLGLB1 /// PLGLB2	N58120	257.769	384.657	516.455	-1.00256	2.00356
L3MBTL1	U89358	506.239	776.125	1014.13	-1.00235	2.00327
PGM5-AS1	H12280	191.208	308.742	383.02	-1.00228	2.00316
GFRA3	AA694259	497.825	330.539	997.03	-1.002	2.00277
UTRN	N66570	577.458	294.279	1156.44	-1.0019	2.00264
CTSF	NM_003793	576.764	703.909	1155.04	-1.00189	2.00262
KIZ	AL117539	80.5088	105.417	161.224	-1.00185	2.00256
STX6	AI884934	161.408	269.061	323.169	-1.00157	2.00218
BBIP1	AK021501	85.515	143.716	171.184	-1.0013	2.0018
LOC101928844	BC033124	90.3701	247.42	180.879	-1.0011	2.00153
SNHG21	AI679611	702.955	765.205	1406.9	-1.00102	2.00141
ERP27	AI051248	48.7411	77.233	97.5182	-1.00053	2.00074
CHD6	BF572029	456.673	608.695	913.533	-1.00029	2.00041
