# Supplementary material for: Differences in Gene Expression Profiles and Phenotypes of Differentiated SH-SY5Y Neurons Stably Overexpressing Mitochondrial Ferritin
Source: Front Mol Neurosci. 2019 Jan 8;11:470. doi: 10.3389/fnmol.2018.00470 (PMC6331485; doi:10.3389/fnmol.2018.00470)
Supplement: Supplemental File 3 — Microsoft Excel File complete results of expression intensities with changes up or down by more than 1 log2 comparing between medium expressing clone and untransfected cells. [file Data_Sheet_3.xlsx]

## Sheet: Upregulated
Gene Symbol	Representative Public ID	High B	Medium	Untransfected	Log2	Fold changes
CALCA	BF447272	549.19	11152.6	228.687	5.60786	48.768
CALCB	AA747379	705.494	6735.43	473.504	3.83032	14.2246
RGS13	AF030107	915.599	1685.92	217.975	2.9513	7.73445
SGK1	NM_005627	1845.59	1324.85	180.591	2.87503	7.33619
FN1	BC005858	910.347	1255.69	197.553	2.66817	6.35623
PLK2	NM_006622	613.723	1129.75	187.647	2.58991	6.02062
VIP	NM_003381	1376.02	1140.04	194.234	2.55321	5.8694
ZDHHC2	AK001608	1586.26	1416.18	246.498	2.52236	5.7452
RGS13	BC036950	161.744	265.018	47.0045	2.49522	5.63814
TMEM74	BC030710	88.1944	664.523	119.052	2.48073	5.5818
CPED1	BF724137	1077.73	1916.29	345.349	2.47219	5.54885
TFPI2	L27624	2785.19	1673.22	340.752	2.29583	4.91038
PRKCH	NM_006255	443.12	720.033	146.735	2.29485	4.90702
EDIL3	AA053711	124.598	293.245	60.0017	2.28903	4.88728
FN1	AK026737	1167.1	1161.89	252.245	2.20358	4.60622
SMIM3	AF313413	449.892	1017.23	231.363	2.13641	4.39667
IGSF11	BE221674	357.665	672.571	154.862	2.1187	4.34302
EGR1	AI459194	1185.22	1212.16	289.622	2.06533	4.18531
TENM1	AL022718	1563.16	798.975	192.312	2.0547	4.15458
ZDHHC2	AI814257	502.555	433.605	108.646	1.99674	3.99098
FN1	X02761	826.219	1180.44	307.239	1.94189	3.84209
EGR1	NM_001964	2663.82	2920.47	768.576	1.92594	3.79985
HTR2B	NM_000867	281.148	609.663	161.16	1.91952	3.78297
MATN2	NM_002380	215.933	160.809	42.6165	1.91587	3.7734
IL13RA1	U81380	132.61	118.595	31.4985	1.91269	3.76511
NQO1	NM_000903	354.161	392.366	104.826	1.90421	3.74304
GDF15	AF003934	6342.54	1085.17	301.76	1.84645	3.59615
CDKN1A	NM_000389	3276.99	1648.41	460.79	1.83889	3.57736
MTUS1	AL096842	142.95	201.417	57.3677	1.81188	3.51099
TFPI2	AL574096	1048.89	680.012	195.496	1.79842	3.47839
LMO4	BC003600	91.6515	224.61	64.8434	1.79239	3.46389
PPP2R2B	AA974416	104.099	1073.56	310.627	1.78915	3.45611
ST6GAL1	AI743792	145.19	241.354	70.5042	1.77537	3.42325
BEND6	N48613	170.501	239.337	70.6963	1.75934	3.38542
TSLP	AW118681	316.808	411.736	121.819	1.75698	3.3799
TSPAN12	NM_012338	330.171	290.936	87.6285	1.73123	3.32011
HEBP2	NM_014320	1092.77	1035.31	319.901	1.69436	3.23633
MAFB	NM_005461	117.083	354.741	109.883	1.69079	3.22834
FRMD3	BF589413	249.688	169.47	52.7631	1.68342	3.21189
KCNK1	U90065	274.827	272.498	86.3631	1.65776	3.15526
LOC101928661	BC034912	68.6237	330.108	106.564	1.63121	3.09774
DCLK1	AI129626	1194.27	1758.67	568.793	1.62851	3.09193
PLD5	AK091691	904.239	2926.65	966.699	1.59811	3.02747
ACTA2	NM_001613	875.097	474.896	158.11	1.58668	3.00358
ALKBH5	BF063303	126.47	205.408	69.2717	1.56815	2.96525
SPATS2L	AU145711	92.5566	145.214	49.1155	1.56393	2.95658
KITLG	AI446414	1291.59	846.827	288.426	1.55387	2.93603
DCLK1	BE672499	230.77	516.618	176.212	1.55178	2.93179
SERTM1	BG413606	79.9557	134.153	45.9791	1.54483	2.91769
LDLRAD4	NM_004338	25.5466	145.454	49.9456	1.54214	2.91226
TBX3	N29712	1181.04	1308.91	449.486	1.54201	2.91201
ATRNL1	BC035157	212.533	294.889	101.654	1.5365	2.90091
CYP26A1	NM_000783	14706.7	25444.7	8817.64	1.5289	2.88565
KIAA0125	NM_014792	1556.07	1046.12	365.723	1.51622	2.8604
MMP28	NM_024302	77.0358	326.248	115.011	1.5042	2.83668
FAM111A	NM_022074	252.729	360.451	127.323	1.5013	2.83099
FN1	AF130095	1231.63	1196.43	423.972	1.4967	2.82197
NLGN1	NM_014932	195.446	270.791	96.1238	1.49421	2.8171
CDK12	AI693362	391.63	616.428	220.68	1.48198	2.79331
HOXD10	AW299531	556.454	890.516	319.417	1.4792	2.78794
SPRY1	BF508662	1063.67	1937.78	696.071	1.4771	2.78388
SLC35F1	AI809083	253.95	154.456	56.2785	1.45654	2.74449
PGLS	AI400224	176.783	157.215	58.9203	1.4159	2.66827
CCNA1	NM_003914	289.684	440.861	166.753	1.40261	2.64379
ZCCHC24	AA131324	359.179	447.916	170.108	1.39677	2.63312
C9orf135	AI768674	136.609	102.539	38.9433	1.39673	2.63304
LOC283788	BG542899	45.6157	80.0401	30.4463	1.39446	2.6289
TXK	NM_003328	890.512	1476.7	564.304	1.38784	2.61686
ANXA2	BC001388	1154.76	784.792	300.287	1.38597	2.61348
ITGA6	NM_000210	47.2345	141.455	54.2321	1.38312	2.60832
TBX3	AI806338	3761.07	3815.46	1473.23	1.37287	2.58985
MMP28	AI927208	269.427	463.956	179.794	1.36765	2.58049
MIR137HG /// MIR2682	BM759658	87.0866	227.103	88.0443	1.36705	2.57942
OLFML3	NM_020190	217.179	272.1	105.653	1.3648	2.57541
INTS6	AW665713	99.7513	137.173	53.3982	1.36113	2.56887
ABHD13	BE301702	143.662	261.705	102.624	1.35057	2.55013
CTSS	BC002642	27.7289	49.3826	19.3687	1.35028	2.54961
IL13RA1	U62858	129.237	135.32	53.3171	1.34371	2.53803
NQO1	BC000906	560.016	485.53	192.515	1.33459	2.52204
TBX3	NM_016569	2061.38	2189.26	878.604	1.31716	2.49175
MSN	NM_002444	676.454	214.88	86.9055	1.30601	2.47257
EGR1	AV733950	463.572	553.447	223.847	1.30593	2.47244
ANXA2	NM_004039	1052.36	758.158	307.711	1.30092	2.46386
RILPL2	AI810244	163.294	186.547	75.9227	1.29694	2.45707
CHRM1	AI500293	353.813	259.877	106.542	1.28641	2.4392
CADM3	AI564838	641.446	2044.2	840.574	1.28209	2.43192
TM6SF1	NM_023003	328.263	407.272	168.001	1.27752	2.42422
RDH10	AW150720	384.932	334.63	138.288	1.27489	2.4198
LONRF2	BF433341	525.964	490.735	203.649	1.26886	2.40971
HPCAL1	BE617588	11123.2	7859.7	3264.26	1.26772	2.40781
ANXA2	BE908217	1029.15	668.998	278.667	1.26346	2.40071
SLC7A11	AA488687	101.615	96.123	40.1728	1.25866	2.39274
NTNG2	AI348745	734.3	577.289	241.339	1.25823	2.39203
NEDD9	U64317	117.521	345.338	144.554	1.2564	2.389
PDSS1	W88801	81.2768	141.061	59.1289	1.25438	2.38565
RUNDC3A-AS1	AK055254	80.0159	145.692	61.1375	1.25279	2.38302
UGT1A8	NM_019076	37.9747	71.3712	29.9606	1.25228	2.38217
ADAM23	BE674466	395.629	442.223	186.252	1.24752	2.37433
LOC286254 /// NALT1	AI471954	213.831	218.186	91.9691	1.24634	2.37238
GNG11	NM_004126	5731.5	3788.08	1600.47	1.24297	2.36685
ANKRD11	AF130076	1806.04	1611.54	681.598	1.24145	2.36436
CCNJL	NM_024565	322.293	371.778	157.802	1.23633	2.35598
DCLK1	BE046461	340.701	832.426	353.619	1.23512	2.35402
THSD4	BG163478	819.106	497.041	211.342	1.23379	2.35183
SPP1	M83248	205.066	207.25	88.2167	1.23225	2.34933
SLC2A6	NM_017585	688.688	598.793	255.079	1.23111	2.34748
HPCAL1	NM_002149	3921.2	2439.98	1039.81	1.23054	2.34655
CEP104	AI936976	399.537	311.132	132.768	1.22862	2.34343
AP5M1	BC013174	104.571	153.936	66.0528	1.22064	2.3305
PHLDB2	AK025444	219.501	148.251	63.6461	1.2199	2.32931
DTX3L	AA577672	365.461	304.932	131.221	1.21649	2.3238
DENND1B	AW071458	71.6305	163.482	70.4593	1.21427	2.32023
AJUBA	NM_032876	92.8212	138.989	59.9877	1.21223	2.31695
AGGF1	NM_013303	836.296	1145.13	497.466	1.20284	2.30192
DCLK1	NM_004734	1163.5	2519.52	1101.6	1.19355	2.28715
SPATS2L	AK002064	5966.83	6417.29	2822.26	1.18511	2.27381
GLRX	AF162769	629.256	650.931	286.379	1.18458	2.27297
GABARAPL1 /// GABARAPL3	AF180519	994.373	1019.02	448.758	1.18317	2.27075
AHNAK	BG287862	1228.46	1601.85	707.129	1.17969	2.26529
TCERG1L	AI732913	573.748	532.819	236.092	1.1743	2.25683
TRIM46	NM_025058	145.261	278.674	123.523	1.1738	2.25605
SSH2	AB072359	122.455	89.343	39.7296	1.16914	2.24878
PLEKHA6	NM_014935	630.523	510.547	227.761	1.16452	2.24159
KCTD12	AA551075	217.096	246.343	109.971	1.16354	2.24006
MYRIP	AL050090	1086.79	1230.08	549.841	1.16166	2.23715
NUDT17	AA481984	200.989	214.096	95.9502	1.1579	2.23132
TNS3	NM_022748	2253.28	4133.08	1861.85	1.15048	2.21988
TRPV5	BC034740	62.743	87.6277	39.4851	1.15008	2.21926
FOXCUT	AA424579	107.172	115.379	52.0076	1.14959	2.2185
SKIL	NM_005414	120.155	103.294	46.5858	1.14879	2.21728
UPP1	NM_003364	312.501	392.432	177.611	1.14372	2.2095
SETDB2	W65369	218.953	304.538	138.232	1.13953	2.20309
CHCHD10	AI814909	575.866	1400.97	636.023	1.13928	2.20271
RGS2	NM_002923	5378.3	5229.07	2375.14	1.13854	2.20158
PLIN3	NM_005817	630.871	906.109	412.206	1.13632	2.1982
RASL10B	BE467359	1091.69	1531.68	697.099	1.13568	2.19722
FAM92A1	AI379467	51.4324	157.634	71.7946	1.13463	2.19562
PLAT	NM_000930	577.796	620.01	282.686	1.13309	2.19328
VIM	AI922599	619.42	607.482	277.295	1.13142	2.19075
MAP4	AI078534	716.697	1237.79	565.271	1.13075	2.18972
TRIB2	BC002637	2124.87	2268.07	1036.16	1.13022	2.18892
GNG11	AW052186	291.835	219.595	100.527	1.12726	2.18443
GABRR2	NM_002043	58.345	128.602	58.876	1.12717	2.18429
TSC22D1-AS1	BE670165	137.085	176.858	80.9784	1.12698	2.18401
SPATA18	AI559300	307.415	129.626	59.4232	1.12526	2.18141
CCDC169	BC013944	160.033	163.971	75.3626	1.12152	2.17576
MEST	NM_002402	555.823	382.39	176.116	1.11852	2.17124
IRGQ	AL134428	80.2309	146.188	67.4513	1.11591	2.16732
PPIC	BE962749	918.013	764.46	353.111	1.11432	2.16493
KCNMB4	AF160967	1005.89	1104.02	510.319	1.11329	2.16339
LOC105379448	N71863	129.826	253.453	117.517	1.10885	2.15673
ADAMTS20	NM_025003	43.5928	53.7926	24.9699	1.10722	2.1543
SMARCD3	NM_003078	1061.29	1368.86	637.648	1.10214	2.14674
TBX2	NM_005994	197.391	418.003	195.063	1.09957	2.14291
CPED1	NM_024913	177.67	207.646	96.9164	1.09932	2.14253
DDAH1	NM_012137	373.768	280.467	131.01	1.09815	2.1408
C15orf39	NM_015492	176.573	250.705	117.256	1.09632	2.13809
SDS	NM_006843	122.073	164.469	77.0856	1.09328	2.13359
LRRN3	AL442092	1142.13	1199.13	563.481	1.08955	2.12808
PLD5	R38585	86.3518	408.991	192.371	1.08818	2.12605
METTL8	AW169973	87.3964	128.883	60.658	1.0873	2.12476
ZNF92	M61872	114.332	148.984	70.34	1.08274	2.11806
CCDC36	BC015057	53.745	122.185	57.8883	1.07772	2.1107
NEGR1	AI123532	30.9528	193.862	91.8646	1.07745	2.1103
MGST1	NM_020300	161.744	100.429	47.6176	1.07661	2.10907
CCNYL1	AW135279	360.567	323.844	153.612	1.07601	2.10819
PRKCH	NM_024064	948.789	1338.88	635.163	1.07583	2.10794
GFER	AF124604	185.822	134.008	63.6676	1.07369	2.10482
MB21D2	AU157304	495.06	665.204	316.173	1.07308	2.10393
SPRED3	BE673775	421.26	634.127	301.855	1.07091	2.10076
SNCA	NM_000345	568.659	981.775	468.041	1.06876	2.09763
ABRACL	AF116682	348.577	480.998	229.399	1.06817	2.09677
SNX10	NM_013322	355.658	508.451	242.687	1.06701	2.09509
VCAM1	NM_001078	56.1056	52.0503	24.8987	1.06383	2.09048
ATP6V0E1	NM_003945	198.835	185.482	88.8283	1.06219	2.0881
KIF16B	AB046810	221.775	255.842	122.531	1.0621	2.08797
ERI1	BE779448	1101.39	1541.24	739.073	1.0603	2.08536
OXR1	AF309387	298.472	178.674	85.7155	1.0597	2.0845
ATAD3B	BC002542	721.072	766.238	369.483	1.05229	2.07381
PTX3	NM_002852	275.855	227.065	109.544	1.05159	2.07282
NSMAF	AU142380	116.885	157.721	76.2024	1.04947	2.06977
BLCAP /// LOC105372607 /// LOC105376973	AA653638	202.211	335.421	162.31	1.04723	2.06655
DCLRE1B	NM_022836	207.547	255.377	123.589	1.04708	2.06634
FAM43A	AW264102	578.529	1375.28	665.661	1.04686	2.06603
SYK	BF593625	165.3	125.945	61.0736	1.04417	2.06218
GPX3	NM_002084	1380.15	1574.97	765.461	1.04092	2.05754
POPDC3	NM_022361	1069.53	867.126	421.546	1.04055	2.05701
CEBPB	AL564683	907.159	773.682	376.413	1.03942	2.05541
GYG1	NM_004130	501.668	580.485	282.643	1.03828	2.05378
DUBR	AA417117	317.212	402.222	195.976	1.03732	2.05241
UNC5B	AA127885	1637.78	2020.98	985.16	1.03663	2.05143
LOC100287525	AW206414	361.388	573.488	279.705	1.03586	2.05033
TPM4	BC002827	1559.66	1420.92	693.463	1.03493	2.04901
LHFPL2	N66633	1585.59	3202.35	1562.96	1.03485	2.0489
USE1	BC006005	562.466	806.748	394.04	1.03378	2.04738
INSIG1	BE300521	563.337	937.644	458.074	1.03346	2.04693
NEK1	AI936517	485.99	382.166	186.913	1.03183	2.04462
NEK1	AK024912	83.6873	124.46	60.91	1.03093	2.04335
LOC101927157	BC041434	60.1	120.112	58.8036	1.03041	2.0426
SNAI2	AI572079	429.241	415.51	203.772	1.02793	2.03909
INHBA	M13436	524.768	294.878	144.751	1.02654	2.03714
PPP1R3B	W60806	1204.44	1414.12	695.096	1.02462	2.03443
INSIG1	NM_005542	1505.97	2506.95	1232.35	1.02453	2.03429
TRIM62	NM_018207	162.778	269.69	132.658	1.0236	2.03298
P2RY4	NM_002565	58.959	115.187	56.6862	1.02291	2.03202
ARID4B	AI051476	76.8867	143.185	70.5941	1.02026	2.02828
BTG2	NM_006763	827.928	735.947	362.926	1.01992	2.02781
AGO4	BE789947	91.5762	162.695	80.2577	1.01946	2.02716
HOXA13	BF055200	49.9178	84.6115	41.7601	1.01873	2.02613
METRN	NM_024042	2161.75	3490.36	1723.86	1.01773	2.02474
TBL2	AK026529	75.737	150.936	74.7342	1.0141	2.01964
MAPK11	U92268	1086.27	1259.79	624.948	1.01138	2.01583
ZDHHC21	AA564788	337.447	393.917	195.657	1.00957	2.01331
GNG2	AK026424	9945.58	13397.9	6655.33	1.00942	2.0131
FOXC1	AU145890	3382.56	4182.77	2077.81	1.00939	2.01306
DDX60L	AK096369	74.5363	108.489	53.9674	1.00739	2.01027
BAG3	NM_004281	214.933	258.746	128.879	1.00552	2.00767
PIP4K2A	AW665227	208.884	194.378	96.8279	1.00537	2.00745
RNF152	NM_173557	54.4962	103.296	51.5297	1.0033	2.00459
UBE2QL1	AW572911	543.925	663.741	331.856	1.00006	2.00008

## Sheet: Downregulated
Gene Symbol	Representative Public ID	High B	Medium	Untransfected	Log2	Fold changes
CARTPT	NM_004291	68.809	63.3438	705.603	-3.47758	11.1393
IGF2 /// INS-IGF2	X07868	1141.47	779.082	6234.12	-3.00034	8.00188
DLK1	U15979	3384.59	2852.64	20953.9	-2.87685	7.34547
NAALAD2	BC038840	84.177	30.6936	205.376	-2.74226	6.69117
IGFBP7	NM_001553	56.1538	41.3965	257.876	-2.6391	6.22941
SOX9	NM_000346	141.46	109.159	549.437	-2.33153	5.03337
INSM2	AA046951	785.043	455.237	2279.4	-2.32396	5.00705
ABI3BP	AB056106	407.373	250.788	1196.92	-2.25478	4.77262
KCNQ5	BF513800	97.0893	53.2905	242.25	-2.18455	4.54585
SEMA6A	AB002438	67.47	74.3408	320.45	-2.10787	4.31055
SPOCK1	AF231124	1624.57	1531.01	6511.89	-2.08859	4.25332
LINC01105	NM_153011	79.0973	89.4934	376.938	-2.07447	4.21191
HIST1H4C	NM_003542	9522.62	3685.67	14647	-1.99061	3.97404
UTRN	N66570	577.458	294.279	1156.44	-1.97443	3.92973
AQP1	AL518391	144.299	92.0403	357.529	-1.95773	3.88449
PDZRN3	AL569804	6589.54	3121.27	11894.6	-1.9301	3.81083
ZNF229	AA180985	118.113	52.7706	198.728	-1.91299	3.76588
SLC16A10	AI935541	38.5754	24.1501	87.9492	-1.86464	3.64178
SYTL4	AL391688	264.781	240.031	848.972	-1.82249	3.53692
SCAF11	AA679858	102.843	104.633	366.264	-1.80755	3.50047
NHS	BF111819	286.717	259.366	894.496	-1.78608	3.44877
N4BP3	AW139448	78.0091	59.1557	202.513	-1.77542	3.42338
LOC101928307	AL833240	491.802	806.376	2734.91	-1.76197	3.39161
SLC18A1	NM_003053	1076.47	957.144	3191.73	-1.73753	3.33464
SMURF1	AL137424	96.9914	155.586	514.489	-1.72543	3.30678
RPL18P10	AV738806	345.723	150.258	496.754	-1.72509	3.30601
ABCA12	AL080207	350.731	190.685	624.121	-1.71063	3.27305
TXNIP	NM_006472	1545.39	2610.13	8462.1	-1.69689	3.24202
VSNL1	NM_003385	48.1587	51.5317	166.685	-1.69359	3.23462
RTKN2	AW665138	202.623	108.04	344.097	-1.67125	3.18491
LOC100130856 /// PSPN	AK095727	94.777	48.464	153.934	-1.66733	3.17626
ZNF826P	BC016785	203.6	215.579	677.669	-1.65237	3.14349
GPR1	AL046992	226.084	135.278	418.819	-1.6304	3.09599
TANC2	BF115054	1637.53	1361.22	4204.11	-1.6269	3.08848
HS6ST2	AI767756	4715.36	1797.19	5525.85	-1.62045	3.07472
GFRA3	AA694259	497.825	330.539	997.03	-1.59282	3.01638
XK	NM_021083	105.633	67.0879	200.725	-1.5811	2.99197
HS6ST2	NM_147174	6029.98	2467.32	7341.19	-1.57307	2.97537
EYA1	AJ000098	868.14	381.046	1131.26	-1.56989	2.96882
SORBS2	AI659533	1065.74	520.77	1537.24	-1.56163	2.95186
ZNF608	AB033107	133.662	123.326	364.029	-1.56157	2.95175
DMD	NM_004010	54.6453	80.5197	234.633	-1.54299	2.91399
NXPH1	N62902	68.4308	84.9875	245.868	-1.53256	2.89299
NR3C1	AI934556	71.0014	43.5842	125.298	-1.52348	2.87484
LINGO2	AA430151	57.9359	79.4673	227.202	-1.51554	2.85906
LOC728730	BG284890	70.1263	42.466	121.214	-1.51317	2.85437
ZNF662	BE671164	425.802	238.763	680.148	-1.51027	2.84864
CCSER1	AB051467	105.697	90.8755	258.233	-1.50671	2.84162
NPY2R	U32500	29.1066	42.394	119.944	-1.50043	2.82927
VEGFA	AF022375	3029.32	2366.92	6692.1	-1.49945	2.82734
UNC5A	R37358	424.47	424.635	1198.08	-1.49643	2.82144
OTUD4	NM_017493	58.8805	34.3426	96.6925	-1.4934	2.81553
TANC2	NM_015623	452.411	433.261	1212.33	-1.48448	2.79816
SULF2	AL034418	212.227	168.939	471.799	-1.48167	2.79272
ROBO2	AB046788	149.986	65.8289	183.541	-1.47931	2.78815
ATP5SL	AW102805	73.8675	41.841	114.876	-1.45708	2.74552
CHGA	NM_001275	9774.73	5992.4	16426.8	-1.45484	2.74127
SULF2	AL133001	699.978	565.232	1547.27	-1.45281	2.73741
LOC728715 /// OVOS /// OVOS2	AW594320	673.438	603.001	1649.23	-1.45156	2.73504
SMO	NM_005631	162.811	91.4847	249.079	-1.445	2.72262
ITGB5	NM_002213	774.508	265.16	721.194	-1.44353	2.71985
HS6ST2	NM_147174	1084.7	519.606	1410.62	-1.44084	2.7148
TOX	NM_014729	139.011	83.583	226.466	-1.43802	2.70948
H19 /// LOC102724852	AL575306	3391.82	1515.28	4093.47	-1.43374	2.70147
LSAMP	AA702209	941.385	607.479	1633.98	-1.42749	2.68978
LOC101928307	AL833240	437.821	856.809	2297.32	-1.42291	2.68125
TOX	AI961231	1606.12	1107.28	2943.43	-1.41047	2.65825
NAAA	AV724215	163.016	91.369	239.734	-1.39166	2.62381
TXNIP	AI439556	896.571	1316.42	3444.44	-1.38765	2.61653
MSH5-SAPCD1 /// SAPCD1	BE674960	1452.93	1057.69	2750.74	-1.3789	2.6007
SLC1A4	AA724708	87.8968	46.5728	120.276	-1.36878	2.58253
CDT1	AF321125	430.74	291.518	749.965	-1.36324	2.57262
ENPP2	L35594	15266.4	8159.98	20932.9	-1.35913	2.56531
THSD7A	R33964	1213.26	695.948	1783.71	-1.35783	2.563
USB1	BC010099	74.4861	29.6257	75.6352	-1.35221	2.55303
FBXO43	BG391951	182.277	150.57	382.743	-1.34594	2.54196
RPH3A	NM_014954	347.548	376.821	952.741	-1.3382	2.52836
ABHD3	AL534702	768.94	375.58	946.831	-1.33399	2.52099
LPAR1	AW269335	350.934	708.836	1779.23	-1.32773	2.51008
PRTFDC1	AI871620	1625.12	642.947	1607.26	-1.32183	2.49983
NUP62CL	NM_017681	121.592	53.3482	133.302	-1.32118	2.49871
USP33	AK023664	54.6715	47.2613	117.659	-1.31588	2.48954
SEMA6A	AF225425	193.002	212.104	526.866	-1.31267	2.484
MCAM	M28882	277.613	252.647	624.661	-1.30595	2.47247
ZGRF1	BF056790	680.936	548.156	1350.92	-1.30128	2.46447
AJAP1	AF052109	74.0477	216.012	531.03	-1.29768	2.45833
MYCN	BC002712	248.13	334.819	821.71	-1.29525	2.45419
THSD7A	AW612111	477.842	299.594	734.78	-1.2943	2.45258
ZNF155	NM_003445	79.4494	122.527	300.351	-1.29355	2.45131
IGFBP7-AS1	AW243434	54.9669	142.003	348.075	-1.29348	2.45119
CNTNAP5	AI796076	1923.45	951.155	2329.66	-1.29237	2.44929
GEM	NM_005261	1909.7	856.286	2081.41	-1.2814	2.43074
ITK	D13720	37.8845	30.0965	72.8831	-1.27599	2.42165
VEGFA	M27281	327.533	229.245	554.88	-1.27528	2.42046
RPS9	BE348997	5849.2	4166.17	10075.6	-1.27407	2.41843
PAPPA	AI110886	159.441	123.899	298.298	-1.26758	2.40758
FANCD2	AA579890	1237.54	739.887	1778.79	-1.26552	2.40413
SFXN4	AI346445	398.718	129.156	310.089	-1.26357	2.40089
RGMB	AL117590	444.433	341.122	818.188	-1.26215	2.39852
THSD7A	BF447246	1148.15	549.482	1313.03	-1.25675	2.38957
CCNF	NM_001761	278.592	162.867	388.711	-1.255	2.38667
TNFRSF10A	W65310	228.023	61.295	146.16	-1.2537	2.38453
RAD54L	NM_003579	766.413	372.984	885.752	-1.24779	2.37477
KCNG3	NM_133329	75.8201	59.135	140.092	-1.24429	2.36901
PHLDA1	AA576961	223.023	123.936	293.527	-1.24391	2.36839
KRIT1	AL049325	1137.32	949.911	2246.23	-1.24164	2.36467
ZEB2	NM_014795	814.042	350.433	828.443	-1.24126	2.36405
ARPP21	AL133109	259.472	237.946	559.835	-1.23437	2.35278
ZNF608	AI452715	1077.29	818.655	1922.51	-1.23166	2.34837
GALNT6	NM_007210	1677.78	532.258	1246.82	-1.22806	2.34252
FAHD2A	NM_016044	533.423	257.764	603.405	-1.22707	2.34092
GPC1	AI354864	71.2569	52.02	121.75	-1.22679	2.34045
VEGFA	H95344	622.936	604.921	1415.68	-1.22668	2.34027
SPATA6L	H15396	36.7284	49.5793	115.788	-1.22367	2.33541
ZNF230	BC030810	317.717	158.205	368.744	-1.22082	2.3308
PDE10A	AI143879	263.073	278.664	648.855	-1.21937	2.32845
GRIA2	NM_000826	222.765	424.37	987.692	-1.21874	2.32743
PELP1	BC002875	256.486	165.366	384.532	-1.21744	2.32534
RPLP2P1	AL133267	79.2435	73.9129	171.799	-1.21683	2.32435
PHLDA1	AI795908	89.3629	92.1478	214.161	-1.21668	2.3241
LPAR1	BF055366	246.758	269.606	626.418	-1.21627	2.32346
DPY19L2	AA758751	194.412	360.677	837.358	-1.21514	2.32163
LOC441666	AF519622	201.296	133.824	310.45	-1.21402	2.31983
ZNF804A	AF052145	41.6753	70.8239	163.934	-1.2108	2.31467
ERI2	AI688141	32.9935	39.1992	90.5188	-1.20739	2.3092
ZNF99	NM_152659	50.3903	42.1601	97.2883	-1.20639	2.30759
MAATS1	BC035248	177.735	91.3239	210.63	-1.20564	2.3064
PTPRM	BC029442	927.081	332.887	764.717	-1.19989	2.29723
GOSR2	AW205003	134.931	126.147	289.605	-1.19898	2.29578
C5orf63	BE674694	110.565	107.394	246.055	-1.19607	2.29114
TNFRSF13C	AW575863	181.764	142.097	325.265	-1.19474	2.28903
ZNF492	AB040906	207.392	192.21	439.609	-1.19354	2.28713
ITGB5	AL048423	235.719	134.334	307.061	-1.1927	2.2858
DLEU2	BC038090	88.4068	43.7236	99.873	-1.19168	2.28419
CDKN1C	R78668	430.057	488.119	1111.18	-1.1868	2.27646
STK3	Z25422	39.204	35.9393	81.7294	-1.18529	2.2741
CD99	NM_002414	2297.42	709.42	1611.85	-1.18401	2.27207
P2RX7	AI655467	238.741	234.103	531.13	-1.18192	2.26878
LOC101929713	AI800806	65.8281	62.4072	141.424	-1.18025	2.26616
CEP152	AB020719	328.379	267.103	605.206	-1.18003	2.26581
ARHGEF10	AL137508	77.2807	94.4125	213.762	-1.17896	2.26413
C21orf58	NM_058180	174.421	101.714	229.846	-1.17614	2.25972
MRPL39	AI809483	89.7453	54.6788	123.366	-1.17389	2.25619
EME1	AK021607	873.427	578.867	1305.44	-1.17323	2.25516
ICA1	NM_022307	1741.87	1702.69	3827.7	-1.16866	2.24803
FAM162B	AI540210	862.325	197.376	443.551	-1.16815	2.24724
SLC1A2	AL157452	294.194	441.989	991.535	-1.16565	2.24335
CDKN1C	D64137	496.057	490.838	1099.62	-1.16369	2.24029
GYG2	U94357	195.653	148.962	333.288	-1.16183	2.2374
GTSF1	BG150433	66.6957	92.0899	205.262	-1.15635	2.22893
MDC1	AI673553	223.428	159.46	354.995	-1.15461	2.22623
AMH	NM_000479	614.468	730.545	1626.17	-1.15443	2.22597
ATP8B1	BG252666	696.377	1141.12	2538.83	-1.15371	2.22485
CACNA1D	N39597	110.834	74.1818	164.795	-1.15153	2.2215
ENPP2	D45421	8664.59	4215.48	9363.56	-1.15136	2.22123
FANCA	NM_000135	660.681	454.684	1007.27	-1.14752	2.21533
EPAS1	AF052094	5087.96	2919	6457.34	-1.14547	2.21217
BICD1	U90030	190.972	94.0477	208.048	-1.14545	2.21215
SENP7	AL136599	959.191	940	2074.83	-1.14226	2.20726
MSH5 /// MSH5-SAPCD1	AF034759	333.857	302.337	666.681	-1.14084	2.20509
KIF20B	NM_016195	916.718	354.967	782.278	-1.14	2.2038
ALG5	AF102850	319.69	141.055	309.874	-1.13542	2.19683
BTBD11	AL040935	271.641	195.677	428.112	-1.12952	2.18785
CAMK4	AI745230	916.413	691.384	1510.05	-1.12703	2.18409
LMBRD1	AU146081	40.7003	30.4012	66.3016	-1.12492	2.18089
CLUHP3	AA429262	143.4	112.126	244.516	-1.12481	2.18073
SGOL1	AK024292	224.187	157.16	341.611	-1.12012	2.17365
CNTNAP5	NM_138996	198.195	93.2548	202.601	-1.11939	2.17255
RBMX	AI080106	317.422	225.589	489.176	-1.11666	2.16844
SORBS2	NM_021069	562.205	398.747	863.581	-1.11486	2.16574
TXNIP	AA812232	1074.09	1890.79	4085.93	-1.11167	2.16096
RDH5	AI887702	217.318	263.337	567.666	-1.10813	2.15566
SORBS2	AK000782	82.5838	99.7626	214.892	-1.10704	2.15403
SLC38A10	BF663461	934.105	942.471	2027.08	-1.10488	2.15081
UCN	NM_003353	214.168	263.696	564.747	-1.09873	2.14166
ATP11B	AK093727	87.7033	66.7586	142.784	-1.09681	2.13881
RGS8	R37101	372.992	146.878	313.699	-1.09476	2.13578
HM13	AL110115	541.328	331.533	707.01	-1.09258	2.13255
RGMB	BE855765	837.954	953.442	2027.85	-1.08874	2.12688
LAMA4	NM_002290	216.596	87.2136	185.472	-1.08858	2.12664
SPAG4	NM_003116	290.342	287.103	609.912	-1.08703	2.12436
OLFM1	R38389	1070.38	976.263	2073.46	-1.0867	2.12387
KIF23	NM_004856	737.195	453.264	960.66	-1.08367	2.11943
BRSK2	AF020089	78.5524	66.9902	141.901	-1.08286	2.11824
SLC16A10	NM_018593	133.399	78.3187	165.733	-1.08143	2.11613
ZNF367	N62196	2188.26	1218.2	2576.94	-1.08091	2.11537
ZNF551	BC005868	463.942	392.534	830.343	-1.08089	2.11534
DDX50	AA903184	251.698	167.112	353.18	-1.07959	2.11343
GRM8	AC000099	78.1547	85.7839	181.188	-1.0787	2.11214
ZNF718	CA411757	30.4836	33.997	71.7952	-1.07848	2.11181
GRIA2	BE219628	145.049	226.935	478.977	-1.07768	2.11064
GDF10	NM_004962	415.934	478.01	1008.84	-1.07759	2.11051
NPL	AW119018	66.7311	79.4227	167.399	-1.07567	2.1077
ZNF764	BC000016	202.423	100.832	212.195	-1.07344	2.10445
FANCC	AF039185	108.252	72.8503	153.061	-1.0711	2.10104
PLK4	AL043646	908.504	596.814	1251.63	-1.06845	2.09718
TRIM73 /// TRIM74	BC033871	107.239	132.786	277.496	-1.06337	2.08981
PLEKHH2	AI913749	170.775	211.568	441.077	-1.05991	2.0848
ZNF704	AW265065	3994.31	3484.62	7264.05	-1.05977	2.0846
SMOC1	AJ249900	864.073	725.962	1513.3	-1.05973	2.08454
TMEM59	BF446758	132.492	97.9224	204.002	-1.05887	2.0833
CCDC152	BF432331	217.776	100.94	210.268	-1.05873	2.0831
FAXDC2	H93077	422.145	161.971	337.349	-1.05851	2.08277
DPY19L2	AI039361	214.183	250.591	521.573	-1.05754	2.08137
ZNF583	AL833236	28.6294	43.0652	89.5352	-1.05593	2.07906
STON2	AA632295	190.123	112.736	234.252	-1.05512	2.07789
LEPR	U50748	510.093	521.765	1083.76	-1.05458	2.07711
HAUS5	AA845355	160.437	141.102	293.07	-1.05451	2.07702
LOC81691	NM_030941	857.257	513.34	1065.32	-1.0533	2.07527
CCDC122	NM_144974	37.6668	48.2506	99.9911	-1.05125	2.07233
LYN	AI356412	598.97	316.905	656.419	-1.05057	2.07135
HNRNPD	W74620	2428.53	3112.1	6437.75	-1.04867	2.06862
LOC729966 /// PDE4C	AI051127	196.473	131.8	272.595	-1.04841	2.06824
CD99	U82164	947.976	325.01	672.09	-1.04817	2.0679
MLLT3	AV756536	165.572	116.059	239.905	-1.04761	2.0671
KIF23	AW192521	254.157	190.545	393.867	-1.04758	2.06705
ZNF704	AI572546	162.736	134.781	278.505	-1.04708	2.06635
POLK	BC014955	75.5668	71.1256	146.763	-1.04505	2.06343
CENPF	U30872	1277.34	749.232	1545.69	-1.04477	2.06304
EFNA5	BE670307	846.76	463.649	956.459	-1.04467	2.06289
C19orf68	AI732404	138.48	69.0958	142.357	-1.04285	2.06029
C1orf226	AA129774	289.71	337.177	691.281	-1.03577	2.0502
CKAP2	BC010901	78.9948	50.7018	103.756	-1.03308	2.04639
TRIM59	N90779	281.763	250.541	512.626	-1.03286	2.04608
NCAPH	D38553	830.661	367.2	751.125	-1.03249	2.04555
BAIAP2L1	AA496034	182.36	106.834	218.001	-1.02896	2.04055
WNT2B	AB045117	48.3674	46.9977	95.8807	-1.02865	2.04012
LOC105371472	N92599	78.9838	124.603	254.013	-1.02756	2.03857
SEMA3F	U38276	187.539	206.613	421.003	-1.0269	2.03764
SRSF11	T90915	79.5974	63.1506	128.08	-1.02018	2.02817
CFAP69	BC036351	455.959	430.146	871.883	-1.01931	2.02695
PIDD1	AF274972	508.062	245.565	497.161	-1.01761	2.02456
N4BP2L1	N80918	740.077	790.434	1599.43	-1.01684	2.02348
LOC105371919	BE674305	104.035	145.387	293.642	-1.01416	2.01973
PARP12	NM_022750	203.582	128.577	259.098	-1.01086	2.01511
CNTNAP5	NM_130773	1184.15	645.719	1300.84	-1.01047	2.01457
BMP8B	AF104013	141.313	53.1617	106.983	-1.00892	2.0124
CDC25C	AF277724	188.927	83.217	167.456	-1.00883	2.01228
DCLK3	AB051552	242.439	113.224	227.726	-1.00812	2.01129
SMC5	BE502701	62.0628	49.5462	99.6295	-1.0078	2.01084
SPC24	AI469788	450.608	370.013	743.985	-1.0077	2.0107
GUCY1A3	BF002625	68.7609	62.6182	125.674	-1.00504	2.007
AURKB	N55457	188.344	127.359	255.255	-1.00304	2.00421
H19 /// LOC102724852	BF569051	18494.1	9563.81	19157.3	-1.00224	2.0031
CALML4	AW025529	250.841	202.948	406.445	-1.00195	2.00271
HJURP	NM_018410	894.642	479.615	960.483	-1.00188	2.00261
USP51	AW474916	224.678	126.101	252.468	-1.00152	2.00211
DBH	NM_000787	6630.3	2991.43	5988.72	-1.00141	2.00196
DPP10	AL538781	308.963	311.298	623.024	-1.00099	2.00137
